# Supplementary material
Source: PubMed Central journal article supplement (PMC6020063)
Supplement: NIHMS974923-supplement-Supplementary.pdf [file NIHMS974923-supplement-Supplementary.pdf]

**Cell Metabolism, Volume 27**

**Supplemental Information**

**Proteome Imbalance of Mitochondrial**

**Electron Transport Chain in Brown**

**Adipocytes Leads to Metabolic Benefits**

**Ruchi Masand, Esther Paulo, Dongmei Wu, Yangmeng Wang, Danielle L. Swaney, David Jimenez-Morales, Nevan J. Krogan, and Biao Wang**

## 1 **SUPPLEMENTAL INFORMATION**

2 Supplemental Information includes seven figures and three tables.

3 Table S1: List of primer sequences for q-PCR. Related to Figure 2.

4 Table S2: Mass spectrometry dataset of BAT from Lkb1<sup>BKO</sup> mice. Related to Figure 2.

5 Table S3: Mass spectrometry dataset of BAT from Tfam<sup>BKO</sup> mice. Related to Figure 4.

6  
7 **Supplementary Figure 1. Related to Figure 1. (A)** Representative H&E staining of  
8 BAT from ~8-10-week old male CON and Lkb1<sup>BKO</sup> mice housed at RT. Scale bar: 50  
9  $\mu$ m. Relative cell size **(B)** and percentage of unilocular adipocytes **(C)** in BAT from ~8-  
10 10-week old CON and Lkb1<sup>BKO</sup> mice housed at RT. Glycerol released *in vitro* prior to  
11 and after Forskolin (FSK) stimulation from BAT **(D)** and eWAT **(E)** from ~8-10-week old  
12 male CON and Lkb1<sup>BKO</sup> mice. Sample size: CON (n=7) and Lkb1<sup>BKO</sup> (n=6). **(F)** Serum  
13 glycerol levels prior to and one-hour after CL injection in ~8-10-week old male CON and  
14 Lkb1<sup>BKO</sup> mice. Sample size: CON (n=13) and Lkb1<sup>BKO</sup> (n=10). **(G)** Core temperature of  
15 ~8-10-week old male CON and Lkb1<sup>BKO</sup> mice housed at RT and 30°C upon 4°C cold  
16 challenge. Sample size: CON/RT (n=14), Lkb1<sup>BKO</sup>/RT (n=14), CON/30°C (n=10) and  
17 Lkb1<sup>BKO</sup>/30°C (n=14). Scatter plots of energy expenditure (EE) during night **(H)** and day  
18 **(I)** over body weight in ~8-10-week old male CON and Lkb1<sup>BKO</sup> mice housed at RT and  
19 30°C. **(J)** Post hoc (Tukey's HSD) pairwise comparison showing the mean difference in  
20 EE between genotypes and ambient temperatures. Average EE **(K)**, respiratory  
21 exchange ratio (RER) **(L)**, VO<sub>2</sub> per body weight **(M)**, VO<sub>2</sub> per mouse **(N)**, food intake  
22 **(O)** and physical activity **(P)** during night and day in ~8-10-week old male CON and  
23 Lkb1<sup>BKO</sup> mice housed at RT and 30°C. Sample size: CON/RT (n=5), Lkb1<sup>BKO</sup>/RT (n=4),

24 CON/30°C (n=5) and Lkb1<sup>BKO</sup>/30°C (n=4). Student t-test. \*:  $p < 0.1$ , \*\*:  $p < 0.05$  and \*\*\*:

25  $p < 0.01$ .

26

27 **Supplementary Figure 2. Related to Figure 2. (A)** Blue native staining of ETC  
28 complexes (C-I, C-II, C-III, C-IV and C-V) and super complexes (Super C) of BAT from  
29 ~8-10-week old male and female CON and Lkb1<sup>BKO</sup> mice housed at 30°C. **(B)**  
30 Mitochondrial cocktail immunoblot showing amounts of representative subunit proteins  
31 of each ETC complex, Ndufb8 (C-I), Sdhb (C-II), Uqcrc2 (C-III), mt-Co1 (C-IV) and  
32 Atp5a (C-V), of BAT of ~8-10-week old male and female CON and Lkb1<sup>BKO</sup> mice  
33 housed at RT and 30°C. **(C)** Quantification of band intensity in panel B. **(D)** Frequency  
34 of mitochondrial and non-mitochondrial proteins identified by mass spectrometry from  
35 isolated mitochondria of ~8-10-week old male CON and Lkb1<sup>BKO</sup> mice housed at RT  
36 and 30°C. Sample size: n=3 for each condition (CON/RT, CON/30°C, Lkb1<sup>BKO</sup>/RT and  
37 Lkb1<sup>BKO</sup>/30°C). **(E)** Principle component analysis of mitochondrial proteome in the four  
38 conditions. **(F, G)** Volcano plots showing significantly (p<0.1) down- or up-regulated  
39 mitochondrial proteins (over 1.5 fold) in Lkb1<sup>BKO</sup> mice at RT and 30°C. **(H, I)** Venn  
40 diagrams showing numbers of down- or up-regulated proteins in Lkb1<sup>BKO</sup> mice which  
41 were overlapped at RT and 30°C. Immunoblots showing protein abundance of C-IV  
42 subunits (mt-Co1, mt-Co2, Cox4, Cox5b and Cox6b1), C-II subunit Sdhb, Sdhc and  
43 Hsp60 in BAT mitochondria from ~8-10-week old male and female betaless and control  
44 mice housed at RT **(J)** and 30°C **(K)**. **(L)** Fold change of steady state mRNA levels of  
45 mtDNA-encoded and nuclear-encoded C-IV subunits in BAT from ~8-10-week-old male  
46 and female betaless and control mice at RT and thermoneutrality. **(M)** Fold change of  
47 mRNA levels of mtDNA- and nuclear-encoded C-I, C-III and C-IV subunits in the BAT of  
48 ~8-10-week-old male and female betaless mice housed at RT and 30°C. Sample size:  
49 betaless and control at RT (n=4 each) and betaless and control at 30°C (n=4 each). **(N)**

50 Immunoblots of Ucp1 and Hsp60 in BAT above mice. **(O)** Relative mRNA levels of *Ucp1*  
51 and *Pgc1α* in BAT from ~8-10-week-old male and female betaless mice housed at RT  
52 and 30°C. Sample size: n=4 for each genotype/condition. **(P)** Heatmap of mRNA and  
53 protein fold change (log2 FC values) of key factors involved in mtDNA replication,  
54 transcription and mitochondrial RNA processing and stability in the BAT of male  
55 *Lkb1<sup>BKO</sup>* mice at RT and thermoneutrality. Protein Log2 FCs were determined by mass  
56 spectrometry. N.D.: not detected. mRNA Log2 FCs were calculated by q-PCR. Sample  
57 size: CON/RT (n=6), *Lkb1<sup>BKO</sup>*/RT (n=6), CON/30°C (n=6) and *Lkb1<sup>BKO</sup>*/30°C (n=6).  
58 Student t-test. \*:  $p < 0.1$ , \*\*:  $p < 0.05$  and \*\*\*:  $p < 0.01$ .  
59

60 **Supplementary Figure 3. Related to Figure 3. (A)** Body weight of male CON and  
61  $Lkb1^{BKO}$  mice at normal chow (NC) at RT. Sample size: CON (n=9) and  $Lkb1^{BKO}$  (n=9).  
62 **(B)** Body weight, lean mass, fat mass, and fat percentage of 18-week-old male CON  
63 and  $Lkb1^{BKO}$  mice at NC at RT. Sample size: CON (n=8) and  $Lkb1^{BKO}$  (n=6). **(C)** Tissue  
64 mass of BAT, iWAT, eWAT, and liver of 18-week-old male CON and  $Lkb1^{BKO}$  mice at  
65 NC at RT. Sample size: CON (n=9) and  $Lkb1^{BKO}$  (n=9). **(D)** Representative H&E  
66 staining of BAT from male CON and  $Lkb1^{BKO}$  mice after 4-week HFD housed at RT and  
67 30°C. Scale bar: 50  $\mu$ m. Relative cell size **(E)** and percentage of unilocular adipocytes  
68 **(F)** in BAT from above mice. Body weight of male CON and  $Lkb1^{BKO}$  mice under 4-week  
69 HFD at RT **(G)** and 30°C **(H)**. Sample size: CON/RT (n=14),  $Lkb1^{BKO}$ /RT (n=13),  
70 CON/30°C (n=17) and  $Lkb1^{BKO}$ /30°C (n=23). **(I)** Representative images of dissected  
71 iWAT, eWAT and BAT tissue from male CON and  $Lkb1^{BKO}$  mice housed at 30°C after 4-  
72 week HFD. **(J)** Representative H&E staining of eWAT from male CON and  $Lkb1^{BKO}$   
73 mice housed at 30°C after 4-week HFD. Scale bar: 100  $\mu$ m. **(K)** Representative H&E  
74 staining of liver from male CON and  $Lkb1^{BKO}$  mice housed at 30°C after 4-week HFD.  
75 Scale bar: 50  $\mu$ m. Insert: hepatocyte circled with dashed yellow line. Red arrowheads:  
76 lipid droplets. **(L)** Serum glucose levels during ITT in male CON and  $Lkb1^{BKO}$  mice after  
77 4-week HFD at RT and 30°C. Area under the curve (AUC) values of glucose levels  
78 showed. Sample size: CON/RT (n=21),  $Lkb1^{BKO}$ /RT (n=9), CON/30°C (n=5) and  
79  $Lkb1^{BKO}$ /30°C (n=4). **(M)** Serum glucose levels during GTT in male CON and  $Lkb1^{BKO}$   
80 mice after 4-week HFD at RT and 30°C. Area under the curve (AUC) values of glucose  
81 levels showed. Sample size: n=7 for each genotype/condition. **(N)** Serum fasting  
82 glucose levels in above mice. **(O)** Serum insulin levels. Sample size: n=4 for each

83 genotype/condition. **(P)** Immunoblots showing amounts of pS473-Akt, total Akt and  
84 Hsp90 in muscle in male CON and Lkb1<sup>BKO</sup> mice after 4-week HFD at RT and 30°C.  
85 Insulin stimulation indicated below. **(Q)** Quantitative analysis of pAkt immunoblots in  
86 panel P. **(R)** Q-PCR analysis of mRNA levels of adipokines (*Adiponectin*, *Leptin*, and  
87 *Fgf21*) and macrophage markers (*Cd68*, *F4/80*, and *Cd11c*) in the eWAT of male CON  
88 and Lkb1<sup>BKO</sup> mice after 4-week HFD at RT and 30°C. Sample size: n=4 for each  
89 genotype/condition. Scatter plots of energy expenditure (EE) during night **(S)** and day  
90 **(T)** over body weight in male CON and Lkb1<sup>BKO</sup> mice after 4-week HFD at RT and 30°C.  
91 **(U)** Post hoc (Tukey's HSD) pairwise comparison showing the mean difference in EE  
92 between genotypes and ambient temperatures. Average EE **(V)**, respiratory exchange  
93 ratio (RER) **(W)**, VO<sub>2</sub> per body weight **(X)**, VO<sub>2</sub> per mouse **(Y)**, food intake **(Z)** and  
94 physical activity **(AA)** during night and day in male CON and Lkb1<sup>BKO</sup> mice after 4-week  
95 HFD at RT and 30°C. Sample size: CON/RT (n=3), Lkb1<sup>BKO</sup>/RT (n=5), CON/30°C (n=6)  
96 and Lkb1<sup>BKO</sup>/30°C (n=6). Student t-test. \*:  $p < 0.1$ , \*\*:  $p < 0.05$  and \*\*\*:  $p < 0.01$ .

97 **Supplementary Figure 4. Related to Figure 4. (A)** Immunoblots of Tfam and Hsp60 in  
98 BAT mitochondria from ~8-10-week old male and female CON and Tfam<sup>BKO</sup> mice  
99 housed at RT. **(B)** Relative *Tfam* and *Ucp1* mRNA levels in BAT of ~8-10-week old male  
100 and female CON and Tfam<sup>BKO</sup> mice housed at RT. Sample size: CON and Tfam<sup>BKO</sup>  
101 (n=6 each). **(C)** Representative H&E staining of BAT from ~8-10-week old male CON  
102 and Tfam<sup>BKO</sup> mice housed at RT. Scale bar: 50  $\mu$ m. Relative cell size **(D)** and  
103 percentage of unilocular adipocytes **(E)** in BAT from ~8-10-week old male CON and  
104 Tfam<sup>BKO</sup> mice housed at RT. Glycerol released *in vitro* prior to and after FSK stimulation  
105 from BAT **(F)** and eWAT **(G)** from ~6-8-week old male CON and Tfam<sup>BKO</sup> mice. Sample  
106 size: CON (n=7) and Tfam<sup>BKO</sup> (n=6). **(H)** Serum glycerol levels prior to and one-hour  
107 after CL injection in ~6-8-week old male CON and Tfam<sup>BKO</sup> mice. Sample size: n=5 for  
108 each genotype. **(I)** Relative mtDNA copy numbers in BAT of ~8-week old male CON and  
109 Tfam<sup>BKO</sup> mice housed at RT. Sample size: CON (n=6) and Tfam<sup>BKO</sup> (n=7). **(J)**  
110 Mitochondrial cocktail immunoblot showing amounts of representative subunit proteins  
111 of each ETC complex, Ndufb8 (C-I), Sdhb (C-II), Uqcrc2 (C-III), mt-Co1 (C-IV) and  
112 Atp5a (C-V), of BAT of ~8-10-week old male and female CON and Tfam<sup>BKO</sup> mice  
113 housed at RT and 30°C. **(K)** Quantification of band intensity in J. Scatter plots of energy  
114 expenditure (EE) during night **(L)** and day **(M)** over body weight in ~8-10-week old male  
115 CON and Lkb1<sup>BKO</sup> mice housed at RT and 30°C. **(N)** Post hoc (Tukey's HSD) pairwise  
116 comparison showing the mean difference in EE between genotypes and ambient  
117 temperatures. Average EE **(O)**, respiratory exchange ratio (RER) **(P)**, VO<sub>2</sub> per body  
118 weight **(Q)**, VO<sub>2</sub> per mouse **(R)**, food intake **(S)** and physical activity **(T)** during night  
119 and day in ~8-10-week old male CON and Tfam<sup>BKO</sup> mice housed at RT and 30°C.



120 Sample size: CON/RT (n=5), Tfam<sup>BKO</sup>/RT (n=8), CON/30°C (n=7) and Tfam<sup>BKO</sup>/30°C

121 (n=5). Student t-test. \*:  $p < 0.1$ , \*\*:  $p < 0.05$  and \*\*\*:  $p < 0.01$ .

122

123 **Supplementary Figure 5. Related to Figure 5. (A)** Frequency of mitochondrial and  
124 non-mitochondrial proteins identified by mass spectrometry from isolated mitochondria  
125 of ~8-10-week old male CON and Tfam<sup>BKO</sup> mice housed at RT and 30°C. Sample size:  
126 n=3 for each genotype/condition. **(B)** Principle component analysis of mitochondrial  
127 proteome in the four conditions. **(C, D)** Volcano plots showing significantly ( $p < 0.1$ )  
128 down- or up-regulated mitochondrial proteins (over 1.5 fold) in Tfam<sup>BKO</sup> mice at RT and  
129 30°C. **(E, F)** Venn diagrams showing numbers of down- or up-regulated proteins in  
130 Tfam<sup>BKO</sup> mice which were overlapped at RT and 30°C. **(G)** Shared down-regulated  
131 proteins (with  $p < 0.1$ ) in BAT mitochondrial proteome of Lkb1<sup>BKO</sup> and Tfam<sup>BKO</sup> mice. I:  
132 Proteins down-regulated at both RT and 30°C in both genotypes. II: Proteins down-  
133 regulated at both RT and 30°C in one genotype but at either RT or 30°C in another  
134 genotype. III: Proteins down-regulated at both RT and 30°C in only one genotype. \*:  
135 mitoribosome, collection of 32 large and small units of mitochondrial ribosome subunits.  
136 #: Complex I, collection of 33 nuclear-encoded complex I subunits. **(H)** Shared up-  
137 regulated proteins (with  $p < 0.1$ ) in BAT mitochondrial proteome of Lkb1<sup>BKO</sup> and Tfam<sup>BKO</sup>  
138 mice. I: Proteins up-regulated at both RT and 30°C in both genotypes. II: Proteins up-  
139 regulated at both RT and 30°C in one genotype but at either RT or 30°C in another  
140 genotype. III: Proteins up-regulated at both RT and 30°C in only one genotype.  
141 Heatmaps of log<sub>2</sub>FC of proteins important for mitochondrial fusion & fission **(I)**,  
142 Glycolysis & TCA cycle **(J)**, and beta-oxidation **(K)** in Lkb1<sup>BKO</sup> and Tfam<sup>BKO</sup> mice at RT  
143 and 30°C. Student t-test. \*:  $p < 0.1$ , \*\*:  $p < 0.05$  and \*\*\*:  $p < 0.01$ .

144

145 **Supplementary Figure 6. Related to Figure 6. (A)** Body weight of male CON and  
146  $Tfam^{BKO}$  mice at normal chow (NC) at RT and 30°C. Sample size: CON/RT (n=7),  
147  $Tfam^{BKO}$ /RT (n=13), CON/30°C (n=7) and  $Tfam^{BKO}$ /30°C (n=7). **(B)** Body weight, lean  
148 mass, fat mass, and fat percentage of ~24-week-old male CON and  $Tfam^{BKO}$  mice at  
149 NC. Sample size: CON/RT (n=6),  $Tfam^{BKO}$ /RT (n=7), CON/30°C (n=7) and  
150  $Tfam^{BKO}$ /30°C (n=7). **(C)** Tissue mass of BAT, iWAT, eWAT, and liver of ~24-week-old  
151 male CON and  $Tfam^{BKO}$  mice at NC. Sample size: CON/RT (n=7),  $Tfam^{BKO}$ /RT (n=10),  
152 CON/30°C (n=7) and  $Tfam^{BKO}$ /30°C (n=7). **(D)** Serum glucose levels during ITT in ~24-  
153 week-old male CON and  $Tfam^{BKO}$  mice at RT and 30°C. Area under the curve (AUC)  
154 values of glucose levels showed. Sample size: CON/RT (n=6),  $Tfam^{BKO}$ /RT (n=7),  
155 CON/30°C (n=7) and  $Tfam^{BKO}$ /30°C (n=7). **(E)** Serum glucose levels during GTT in ~24-  
156 week-old male CON and  $Tfam^{BKO}$  mice at RT and 30°C. Area under the curve (AUC)  
157 values of glucose levels showed. Sample size: CON/RT (n=6),  $Tfam^{BKO}$ /RT (n=7),  
158 CON/30°C (n=7) and  $Tfam^{BKO}$ /30°C (n=7). **(F)** Serum insulin levels in ~24-week-old  
159 male CON and  $Tfam^{BKO}$  mice at RT and 30°C. Sample size: CON/RT (n=4),  
160  $Tfam^{BKO}$ /RT (n=4), CON/30°C (n=7) and  $Tfam^{BKO}$ /30°C (n=7). **(G)** Liver triglyceride  
161 contents of ~24-week-old male CON and  $Tfam^{BKO}$  mice at RT and 30°C. Sample size:  
162 CON/RT (n=5),  $Tfam^{BKO}$ /RT (n=7), CON/30°C (n=7) and  $Tfam^{BKO}$ /30°C (n=7). **(H)**,  
163 Serum triglyceride contents of ~24-week-old male CON and  $Tfam^{BKO}$  mice at RT and  
164 30°C. Sample size: CON/RT (n=5),  $Tfam^{BKO}$ /RT (n=7), CON/30°C (n=7) and  
165  $Tfam^{BKO}$ /30°C (n=7). **(I)**, Q-PCR analysis of mRNA levels of macrophage markers *Cd68*,  
166 *F4/80* and *Cd11c* in eWAT of ~24-week-old male CON and  $Tfam^{BKO}$  mice at RT and

167 30°C. Sample size: n=6 per genotype/condition. Student t-test. \*:  $p < 0.1$ , \*\*:  $p < 0.05$  and

168 \*\*\*:  $p < 0.01$ .

169

170 **Supplementary Figure 7. Related to Figure 6. (A)** Serum glucose levels during ITT in  
171 male CON and Tfam<sup>BKO</sup> mice after 4-week HFD at RT and 30°C. Area under the curve  
172 (AUC) values of glucose levels showed. Sample size: CON/RT (n=8), Tfam<sup>BKO</sup>/RT  
173 (n=7), CON/30°C (n=8) and Tfam<sup>BKO</sup>/30°C (n=8). **(B)** Serum glucose levels during GTT  
174 in male CON and Tfam<sup>BKO</sup> mice after 4-week HFD at RT and 30°C. Area under the  
175 curve (AUC) values of glucose levels showed. Sample size: CON/RT (n=5),  
176 Tfam<sup>BKO</sup>/RT (n=7), CON/30°C (n=6) and Tfam<sup>BKO</sup>/30°C (n=6). **(C)** Serum fasting  
177 glucose levels in above mice. **(D)** Serum insulin levels in male CON and Tfam<sup>BKO</sup> mice  
178 after 4-week HFD at RT and 30°C. Sample size: n=4 per genotype/condition. **(E)** Q-  
179 PCR analysis of mRNA levels of macrophage markers *Cd68*, *F4/80* and *Cd11c* in  
180 eWAT of male CON and Tfam<sup>BKO</sup> mice after 4-week HFD at RT and 30°C. Sample size:  
181 n=6 per genotype/condition. **(F)** Representative H&E staining of liver from male CON  
182 and Tfam<sup>BKO</sup> mice after 4-week HFD at RT and 30°C. Scale bar: 50 μm. Insert:  
183 hepatocyte circled with dashed yellow line. Black arrowheads: lipid droplets. **(G)** Liver  
184 triglyceride contents of male CON and Tfam<sup>BKO</sup> mice after 4-week HFD at RT and 30°C.  
185 Sample size: CON/RT (n=8), Tfam<sup>BKO</sup>/RT (n=8), CON/30°C (n=5) and Tfam<sup>BKO</sup>/30°C  
186 (n=3). **(H)** Serum triglyceride contents of male CON and Tfam<sup>BKO</sup> mice after 4-week  
187 HFD at RT and 30°C. Sample size: CON/RT (n=7), Tfam<sup>BKO</sup>/RT (n=10), CON/30°C  
188 (n=11) and Tfam<sup>BKO</sup>/30°C (n=10). **(I)** Immunoblots showing amounts of pS473-Akt, total  
189 Akt and Hsp90 in muscle in male CON and Tfam<sup>BKO</sup> mice after 4-week HFD at RT and  
190 30°C. Insulin stimulation indicated below. **(J)** Quantitative analysis of pAkt immunoblots  
191 in panel I. Scatter plots of energy expenditure (EE) during night **(K)** and day **(L)** over  
192 body weight in male CON and Tfam<sup>BKO</sup> mice after 4-week HFD at RT and 30°C. **(M)**

193 Post hoc (Tukey's HSD) pairwise comparison showing the mean difference in EE  
194 between genotypes and ambient temperatures. Average EE **(N)**, respiratory exchange  
195 ratio (RER) **(O)**, VO<sub>2</sub> per body weight **(P)**, VO<sub>2</sub> per mouse **(Q)**, food intake **(R)** and  
196 physical activity **(S)** during night and day in male CON and Tfam<sup>BKO</sup> mice after 4-week  
197 HFD at RT and 30°C. Sample size: CON/RT (n=4), Tfam<sup>BKO</sup>/RT (n=4), CON/30°C (n=7)  
198 and Tfam<sup>BKO</sup>/30°C (n=5). **(T)** Relative mRNA levels of *Ucp1*, *Cox8b* and *Cidea* in iWAT  
199 of ~8-10-week old male CON and Tfam<sup>BKO</sup> mice housed at RT or 30°C. Sample size:  
200 CON/RT (n=5), Tfam<sup>BKO</sup>/RT (n=6), CON/30°C (n=5) and Tfam<sup>BKO</sup>/30°C (n=5). **(U)**  
201 Immunoblots of Ucp1 and Hsp90 in iWAT of ~8-10-week old male CON and Tfam<sup>BKO</sup>  
202 mice housed at RT and 30°C. **(V)** Representative H&E staining of iWAT from ~8-10-  
203 week-old male CON and Tfam<sup>BKO</sup> mice fed with normal chow (NC) at RT and 30°C, or  
204 with HFD at RT and 30°C. Scale bar: 100 μm. Student t-test. \*:  $p < 0.1$ , \*\*:  $p < 0.05$  and  
205 \*\*\*:  $p < 0.01$ .  
206

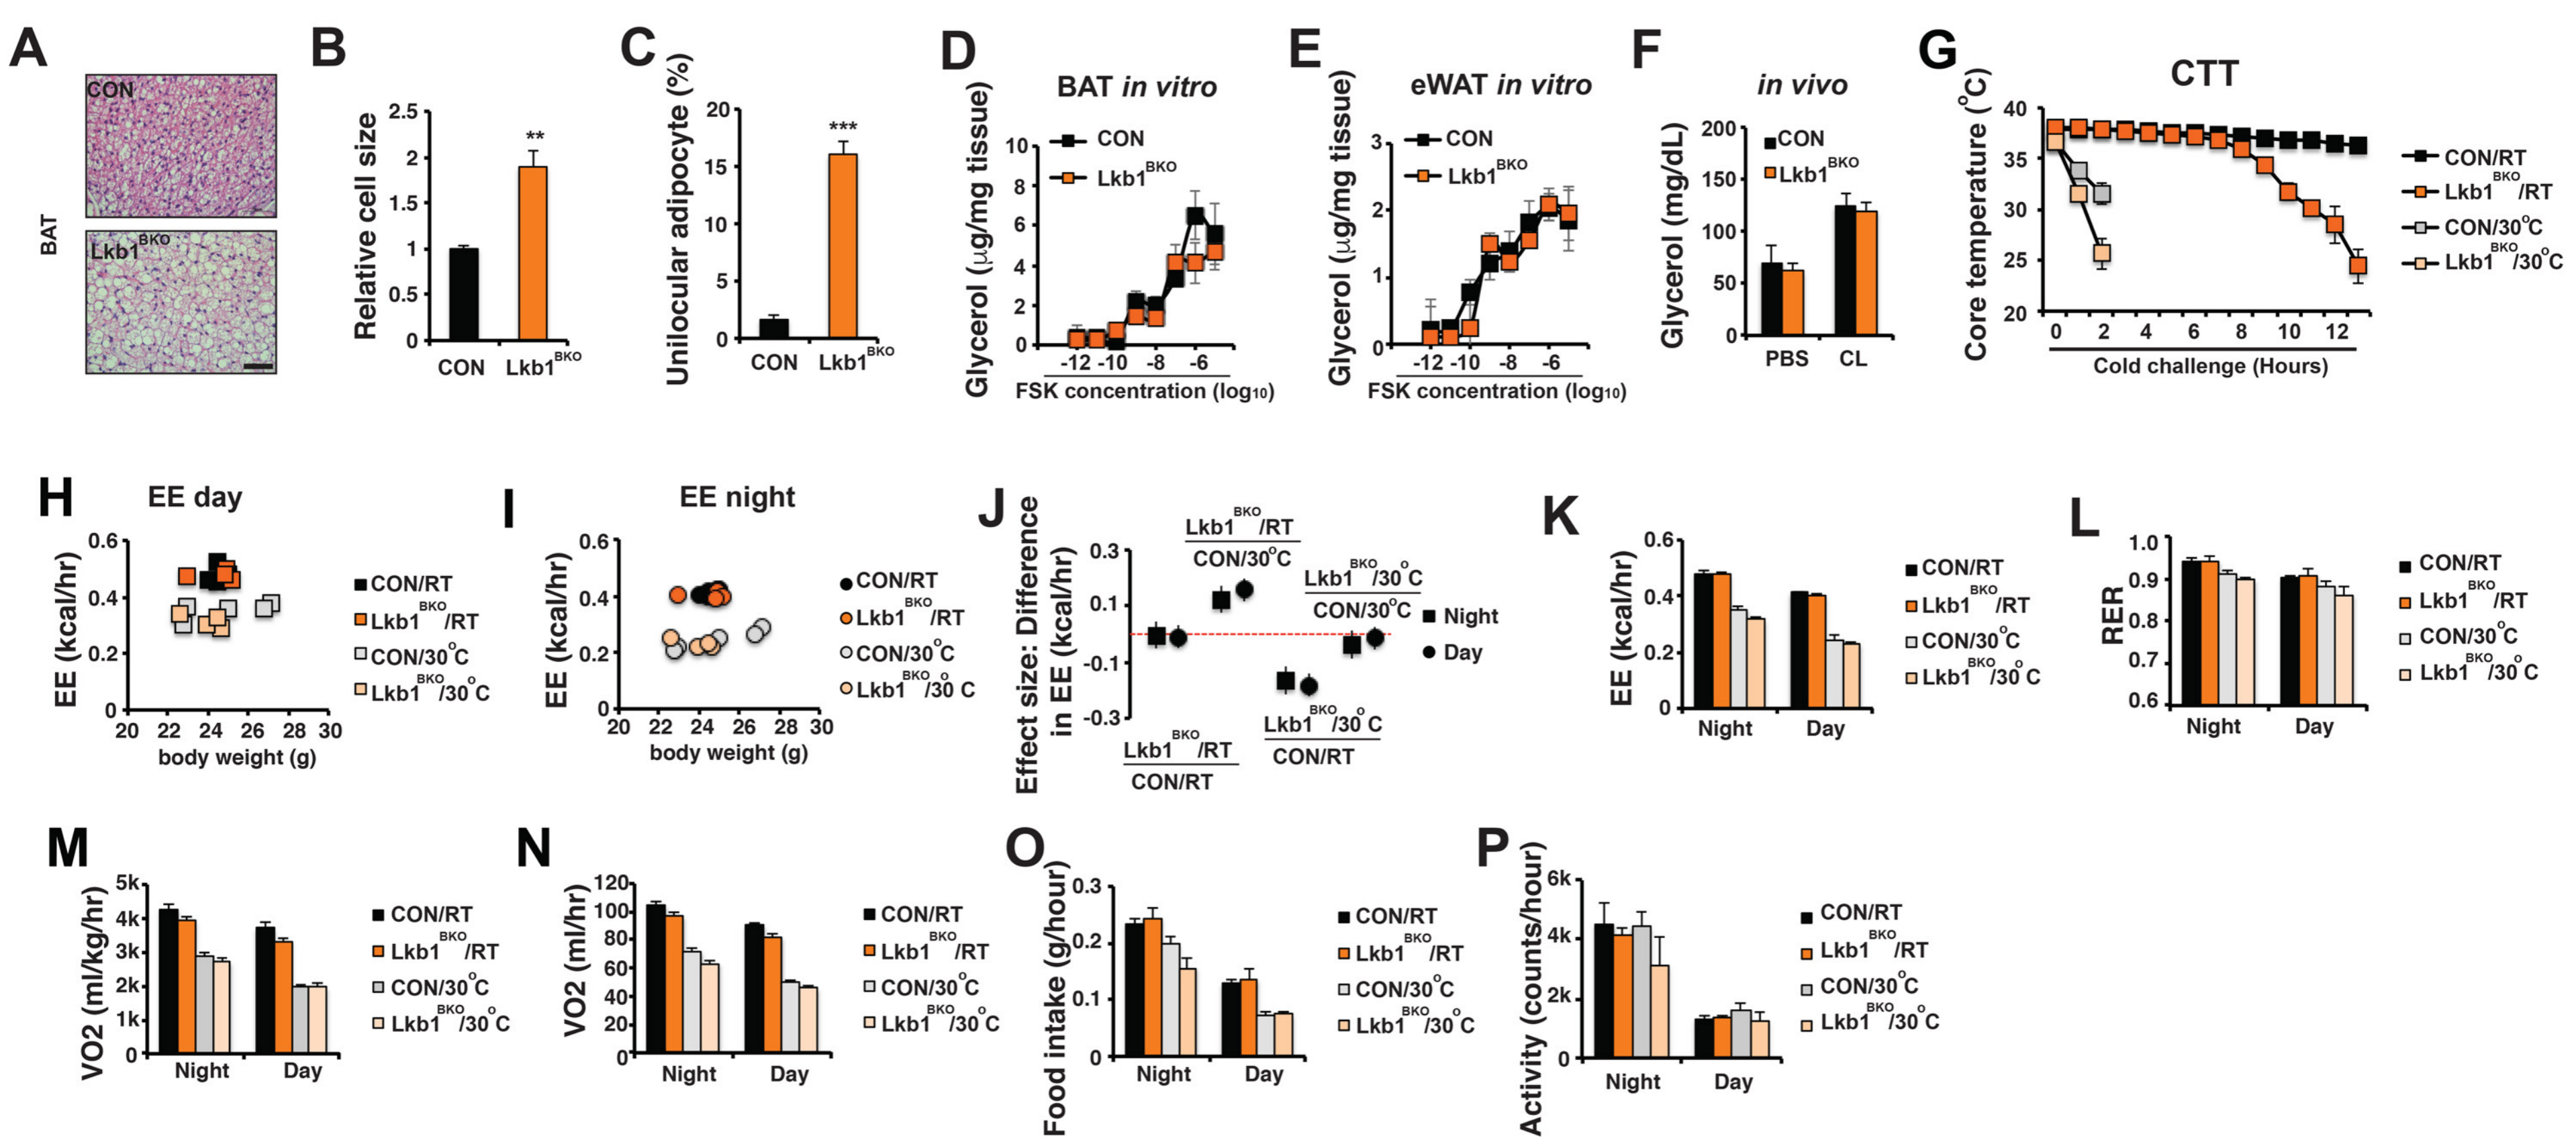

Supplementary Figure 1

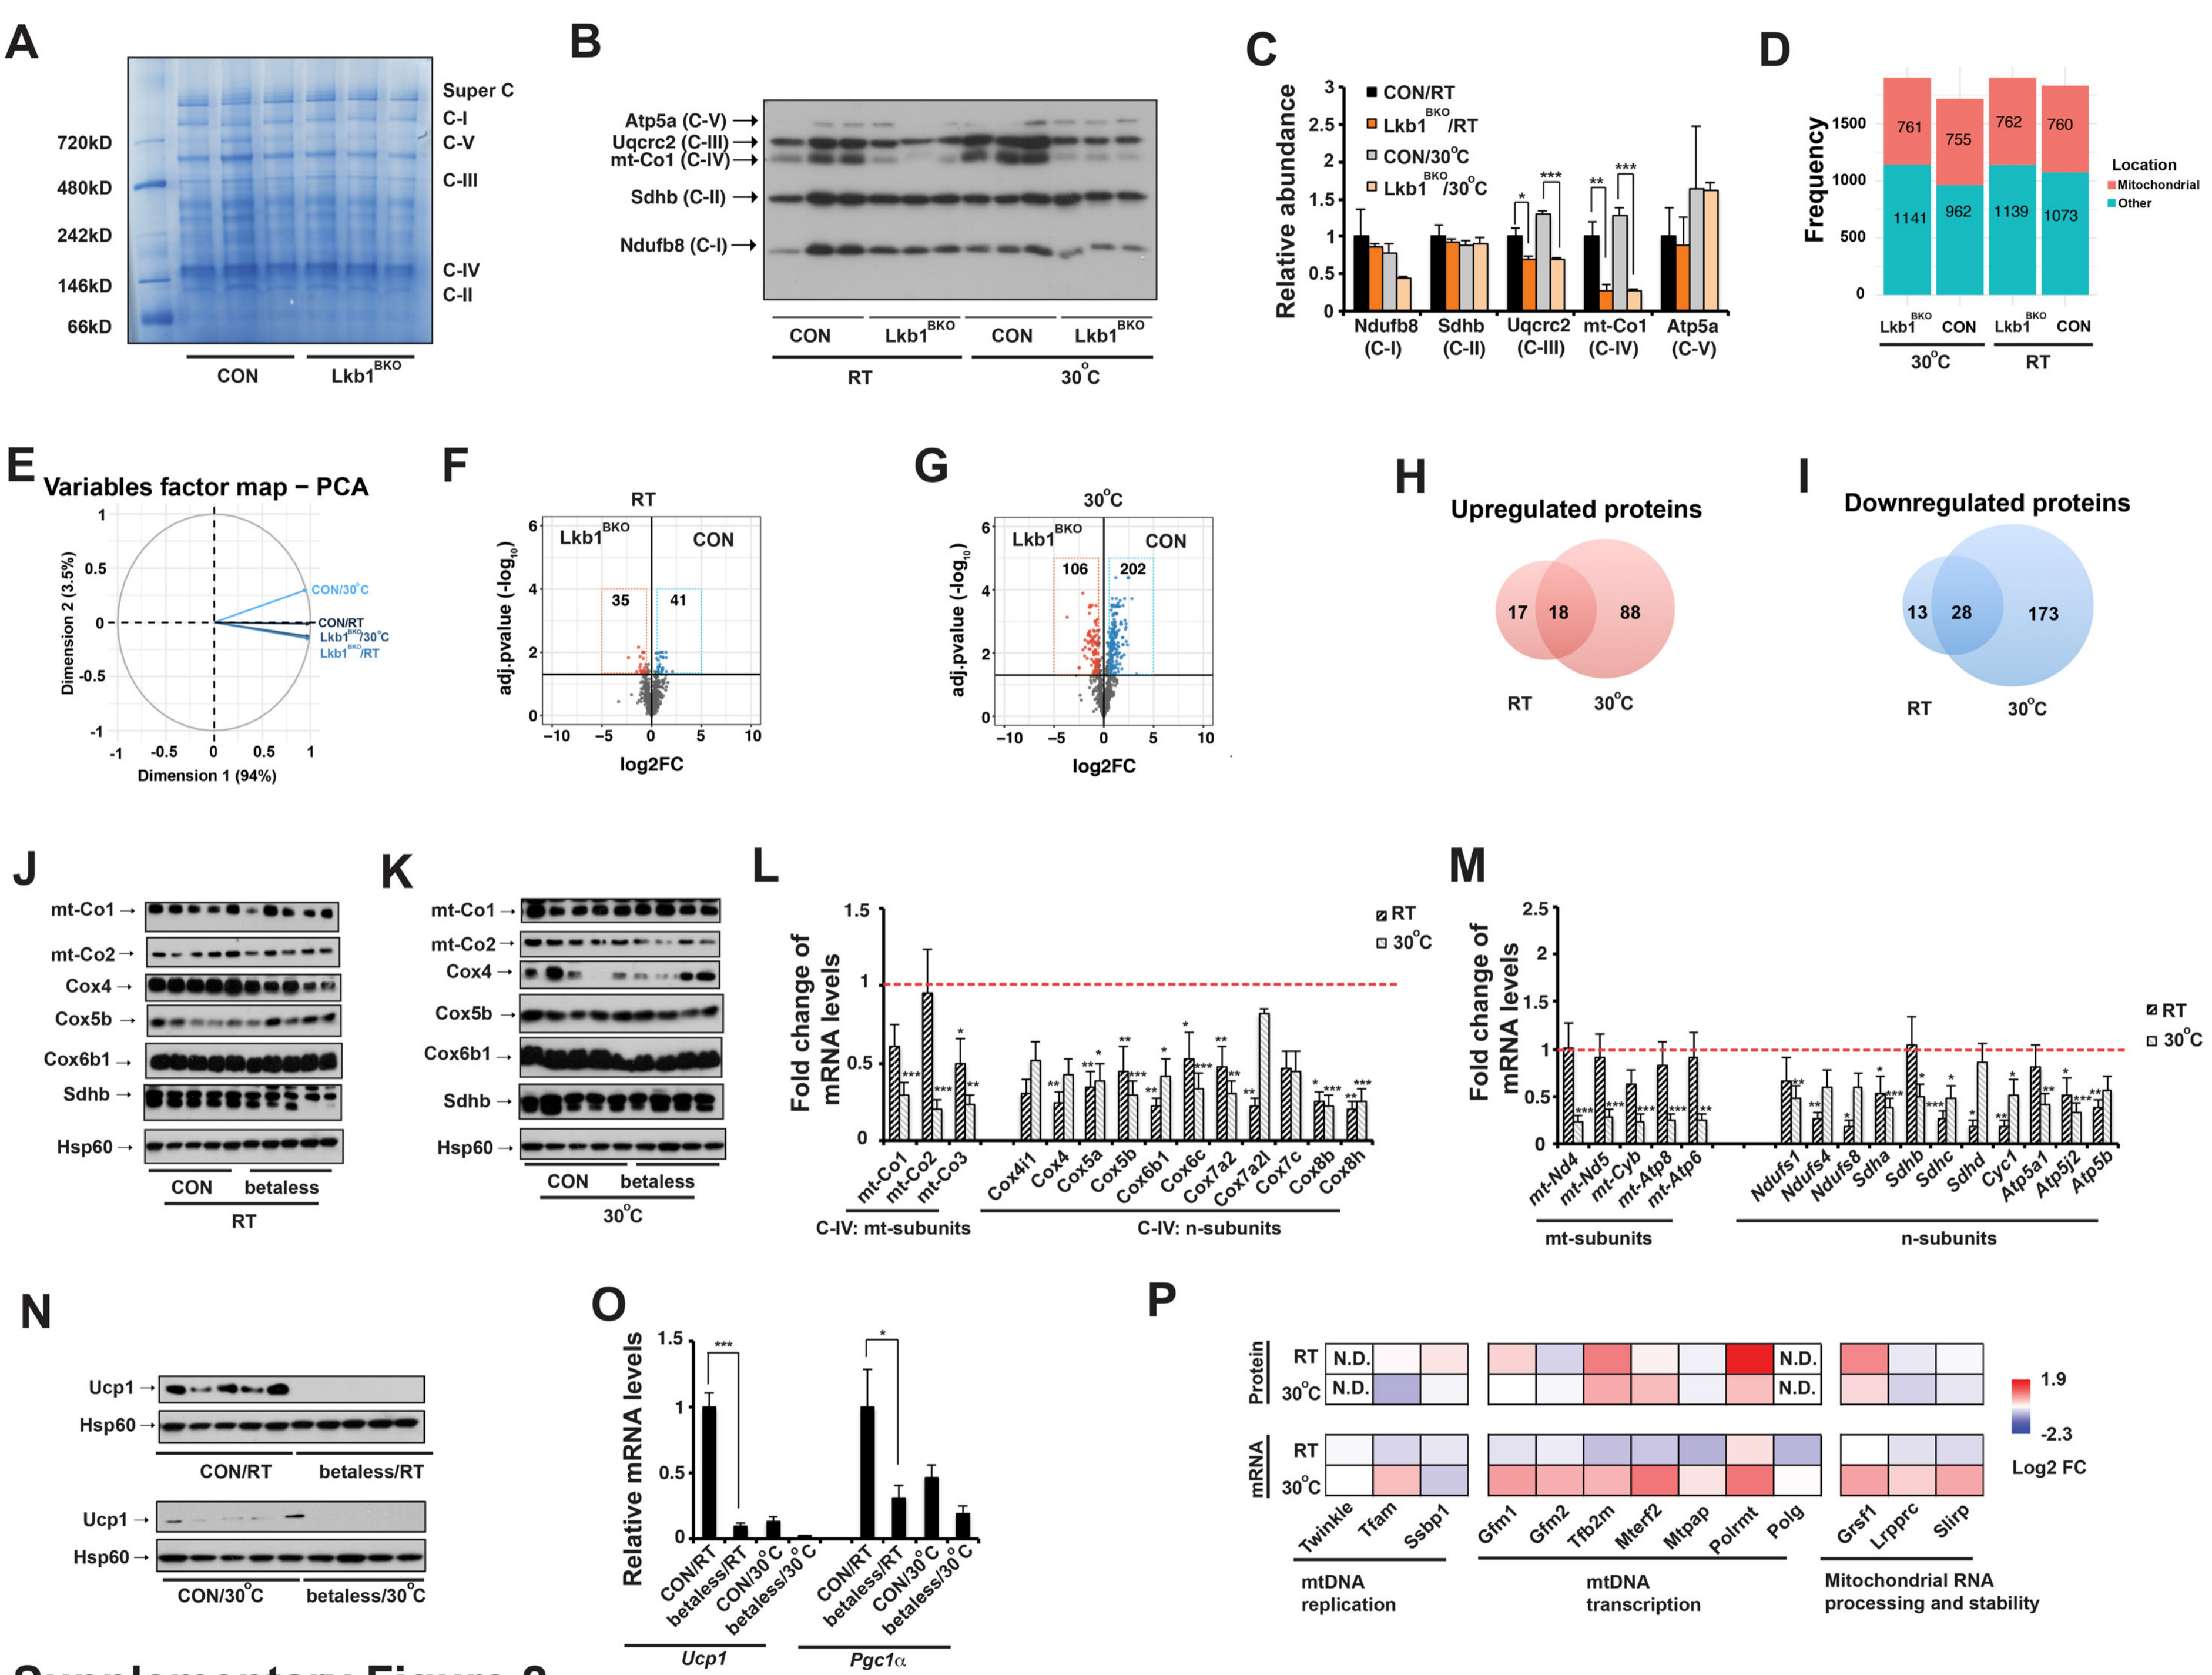

Supplementary Figure 2



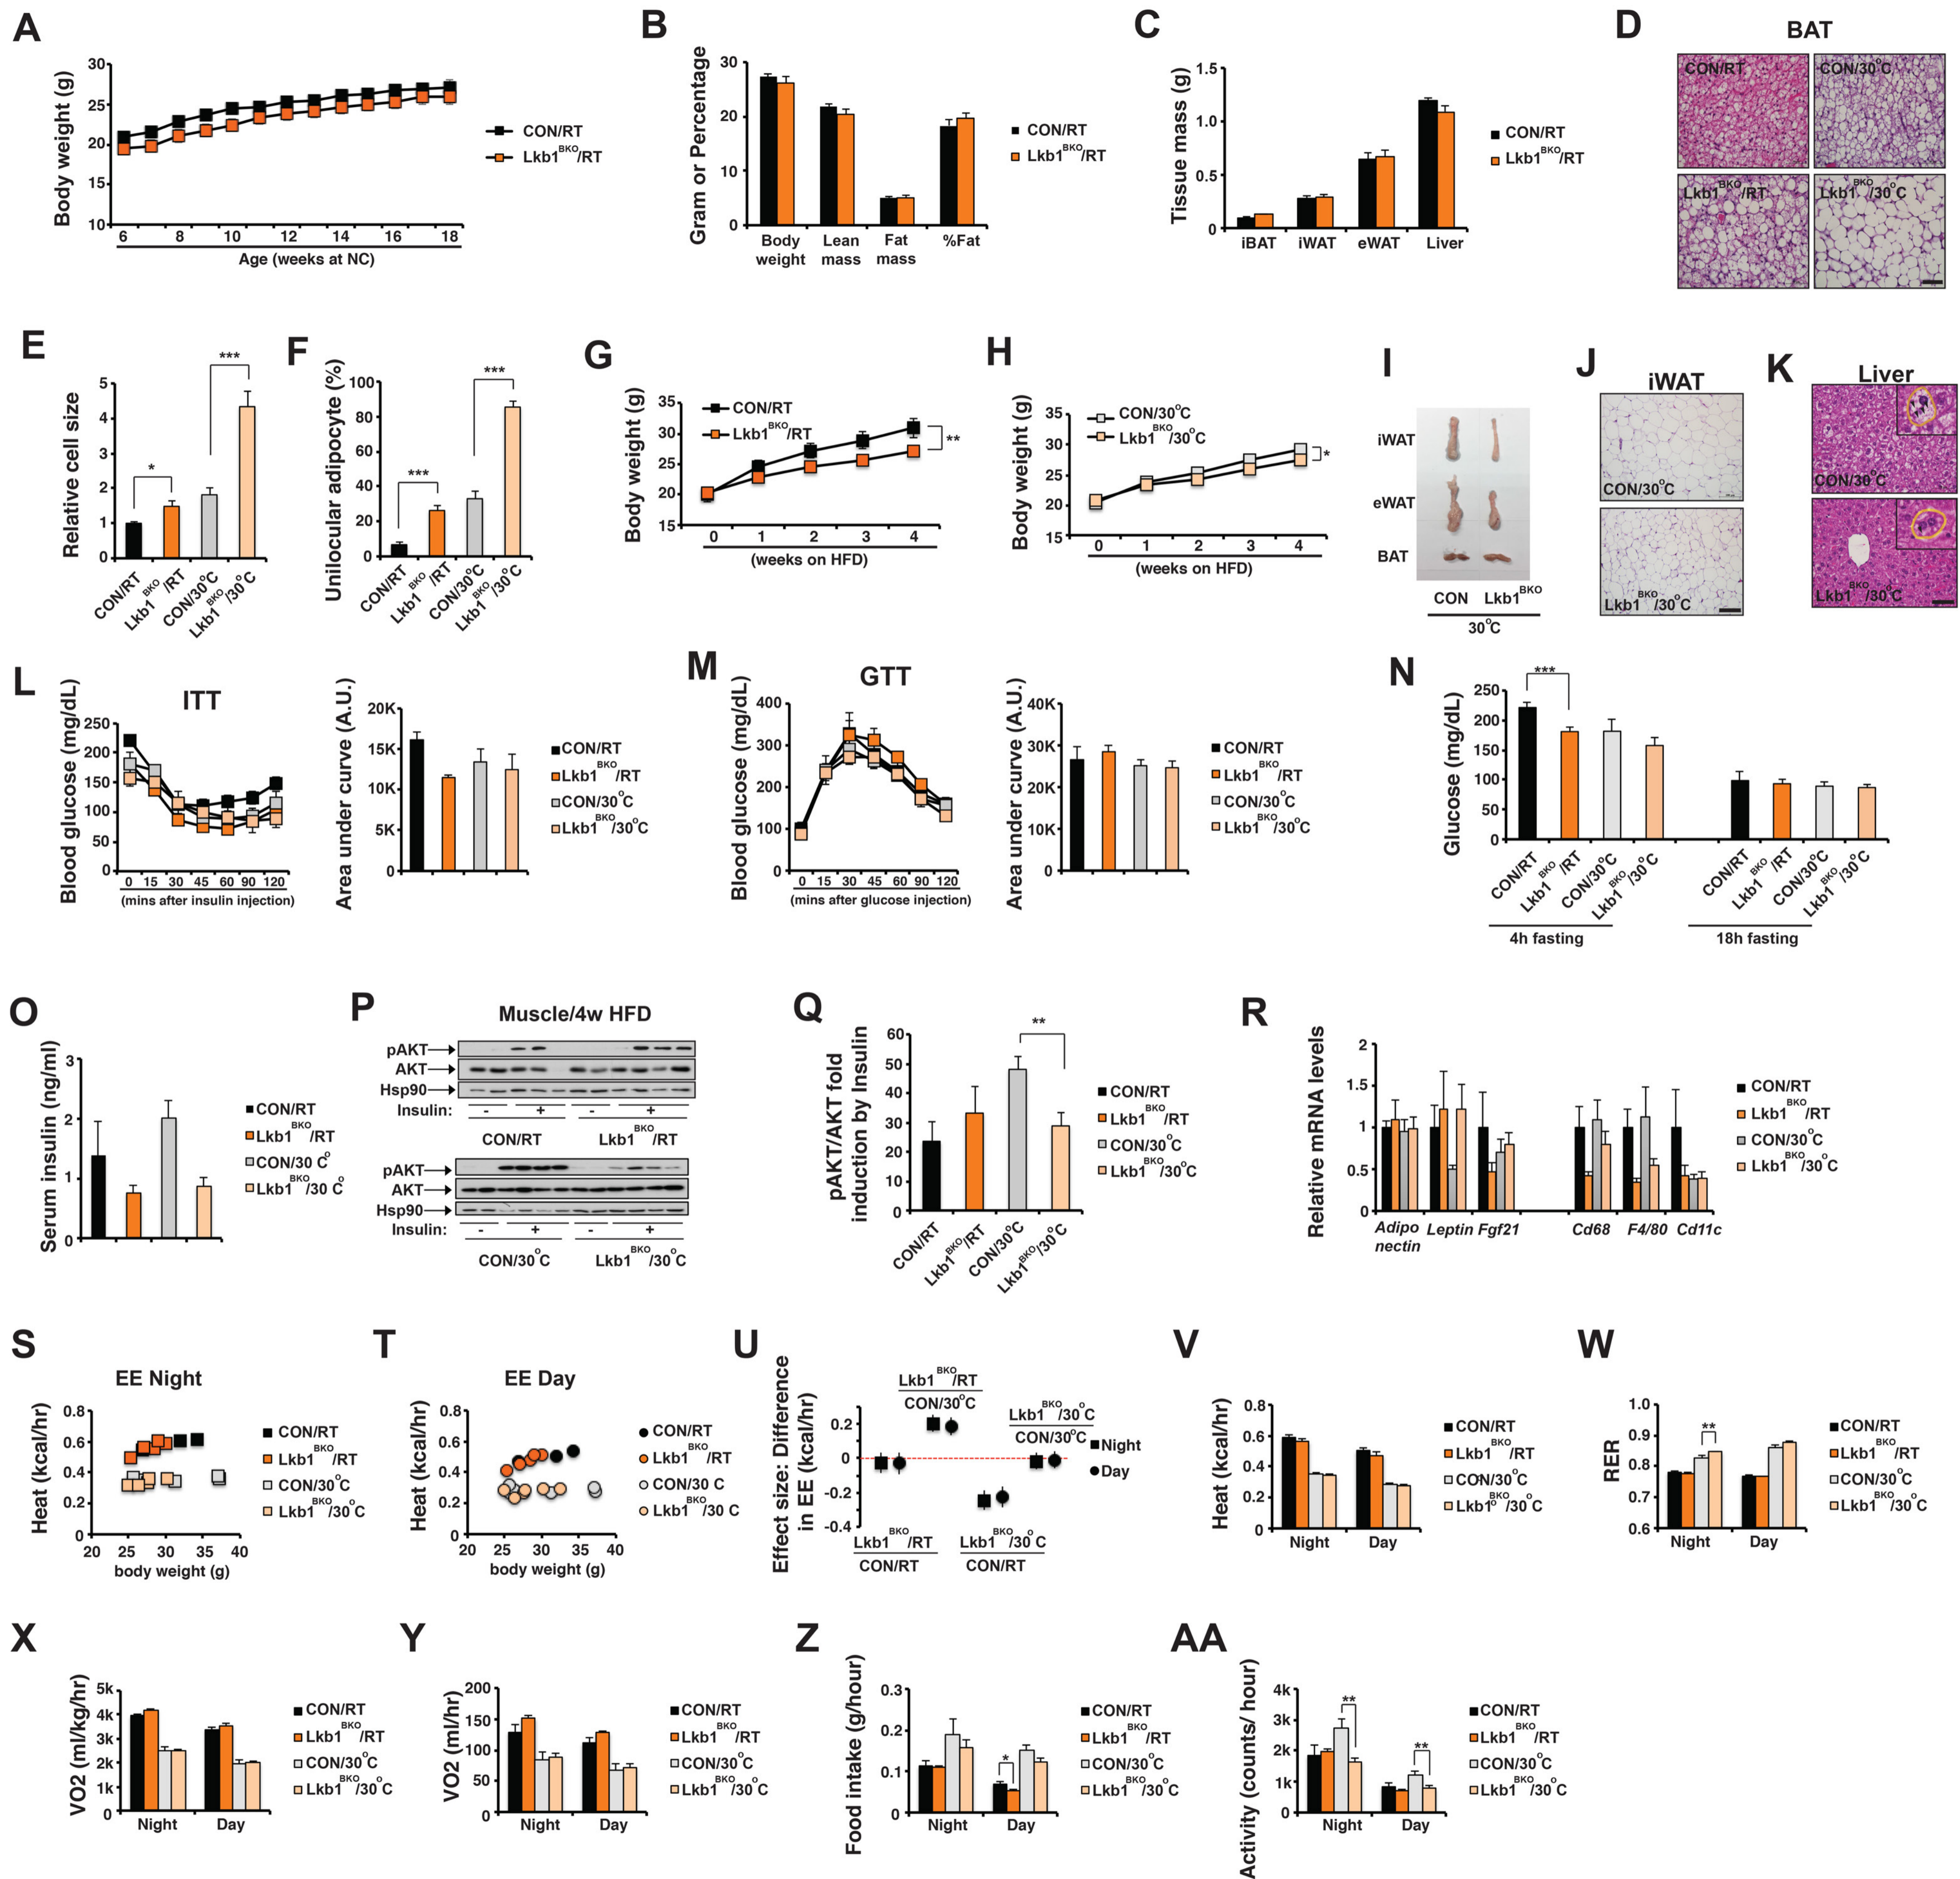

Supplementary Figure 3

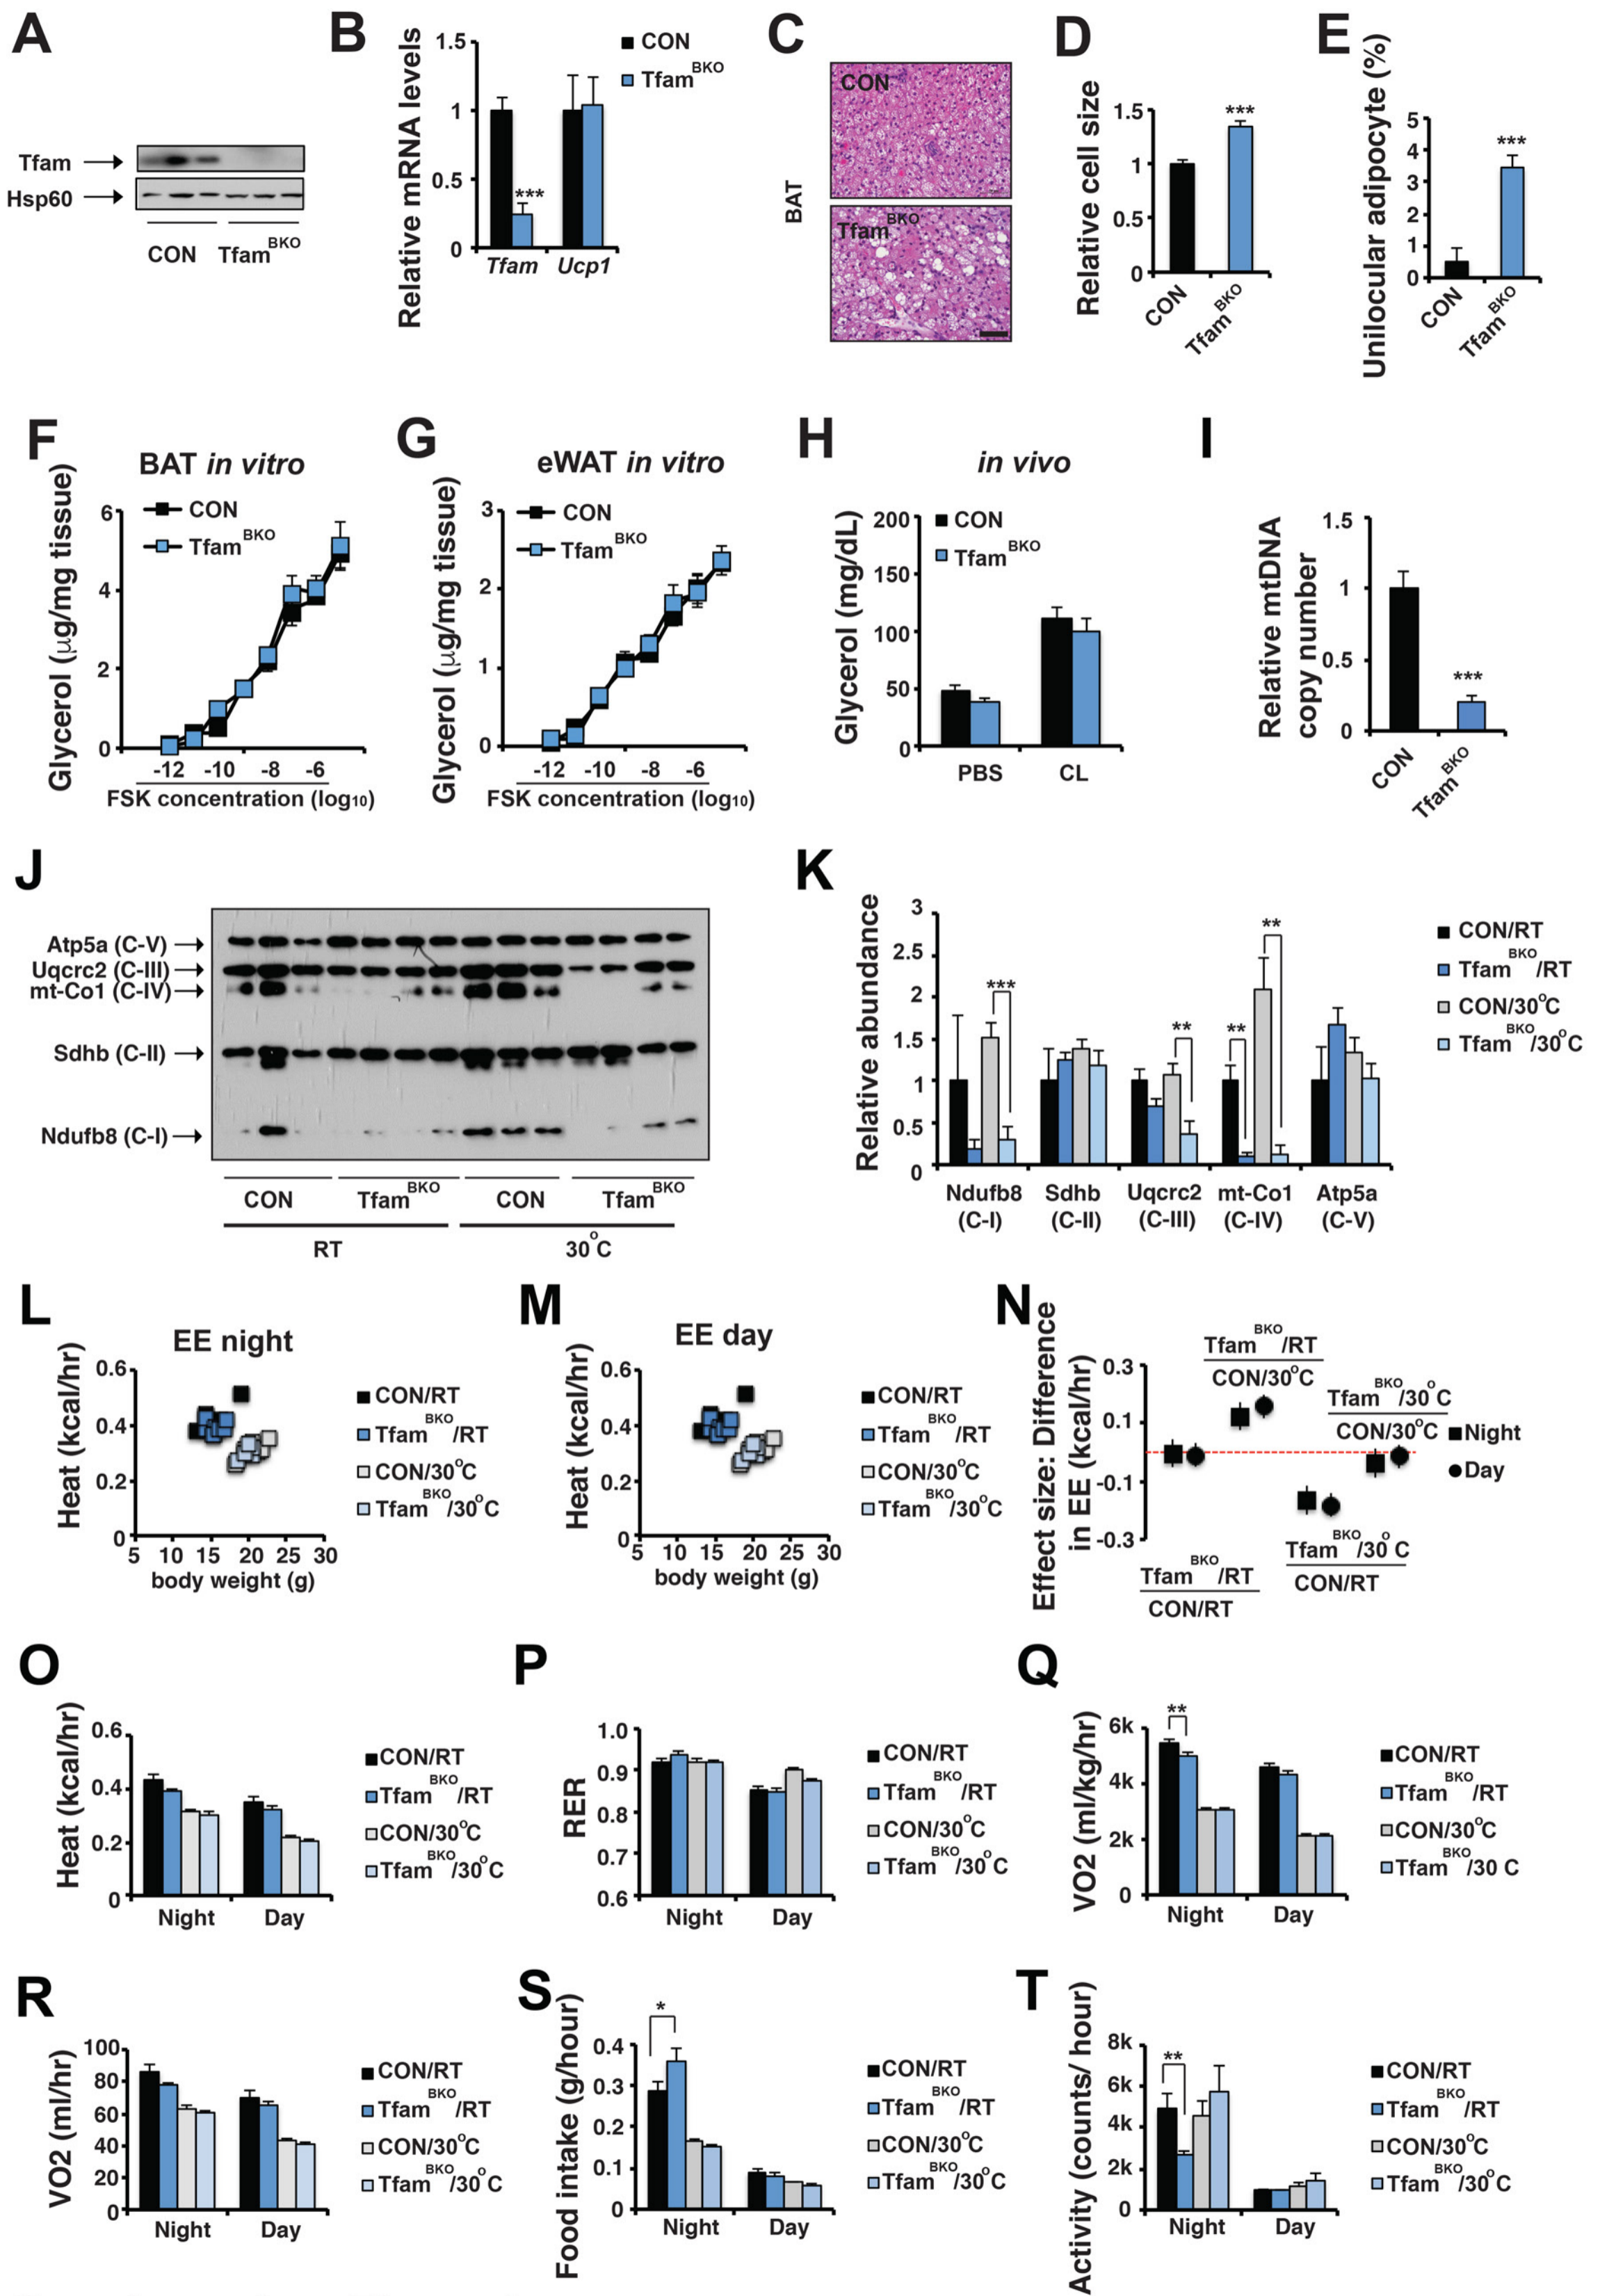

Supplementary Figure 4

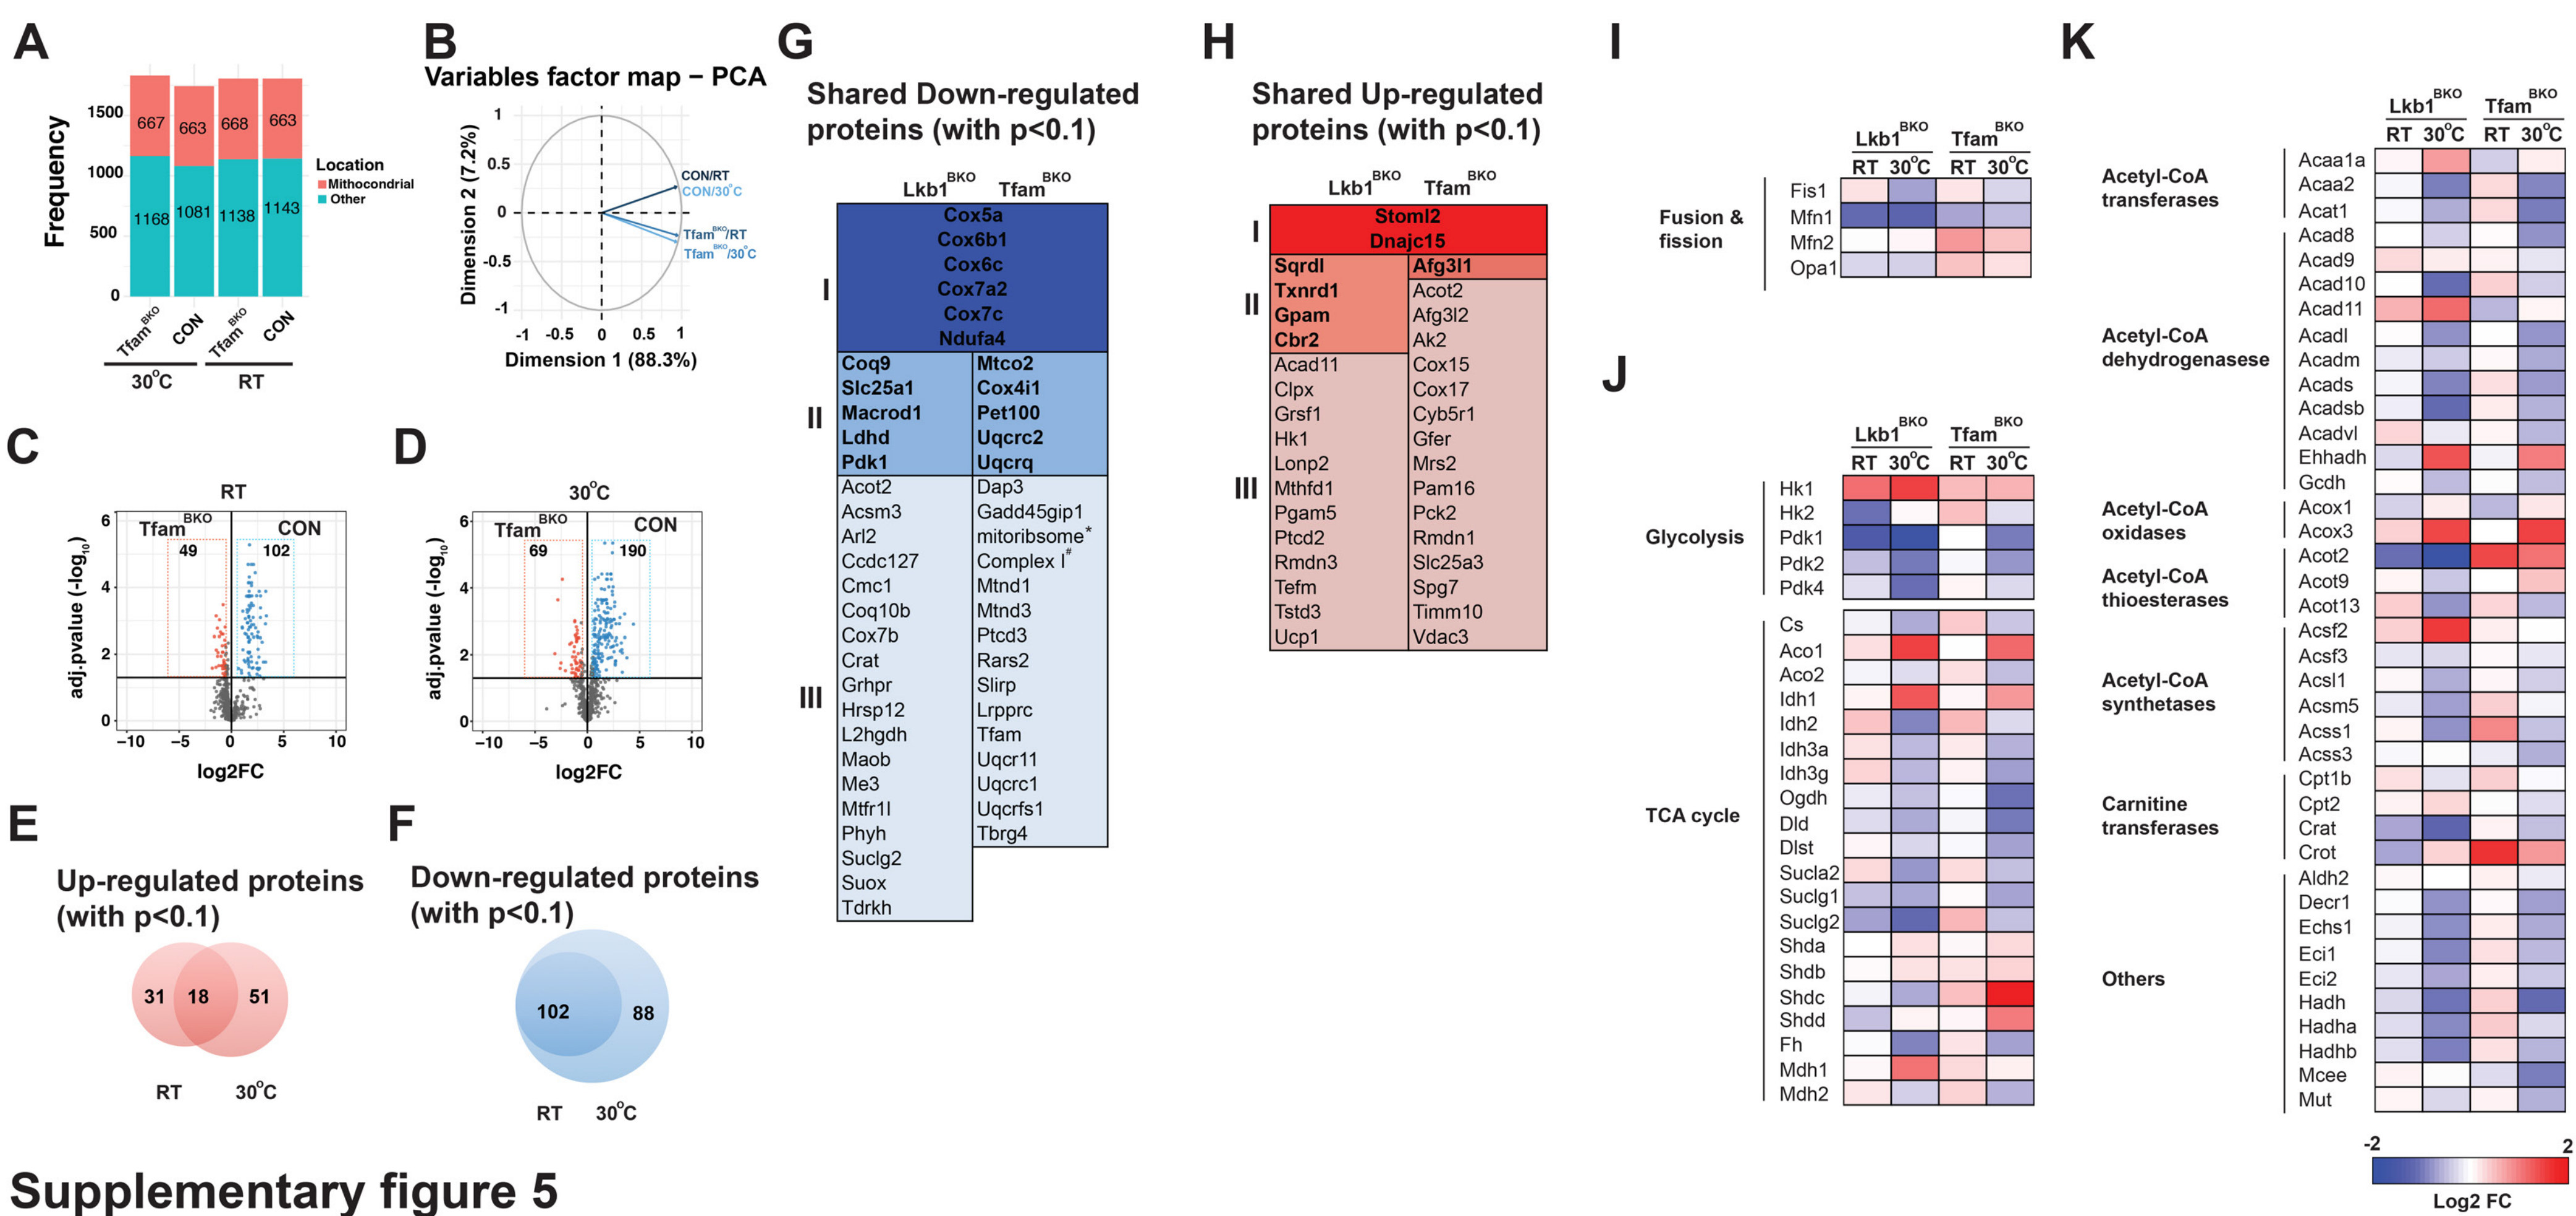

Supplementary figure 5

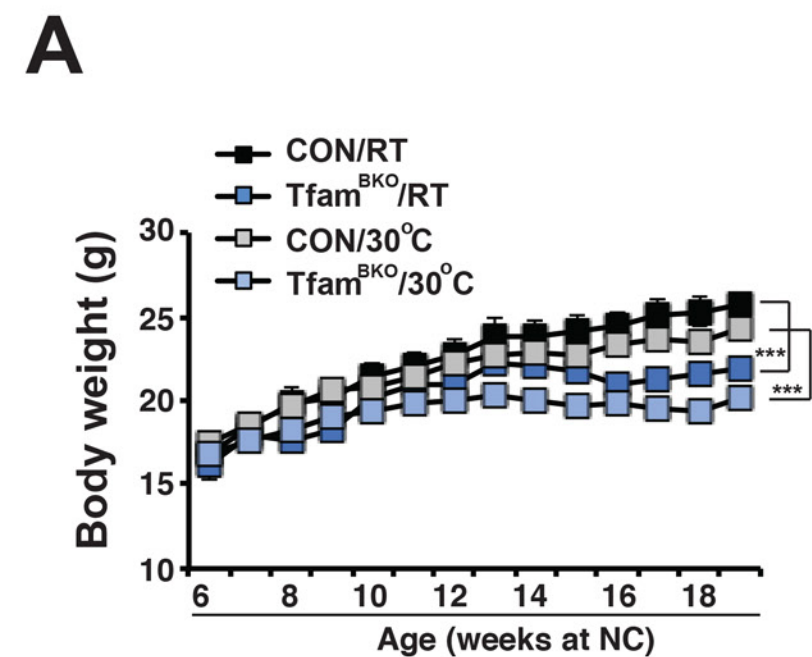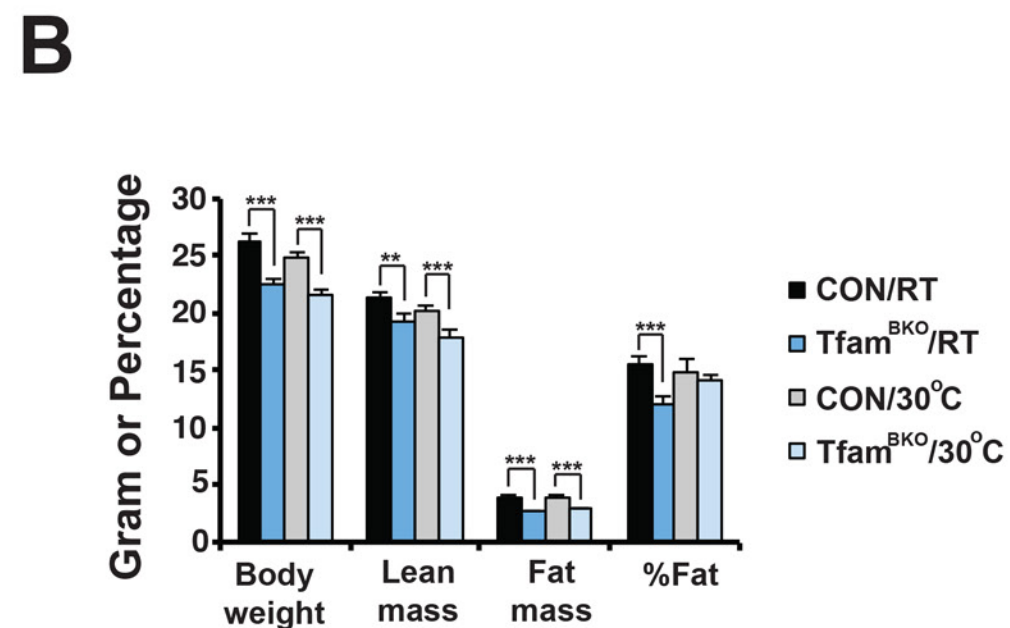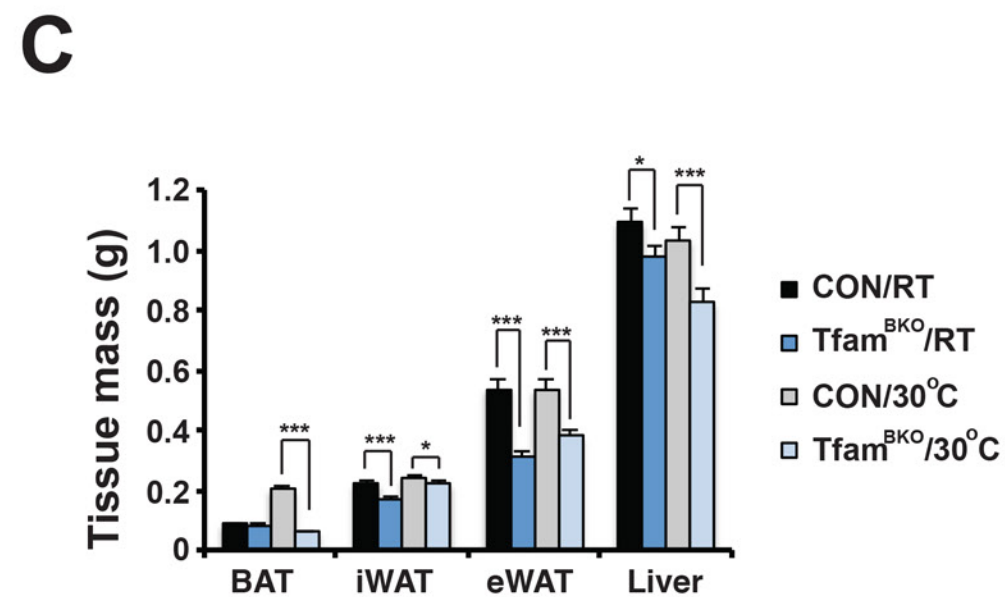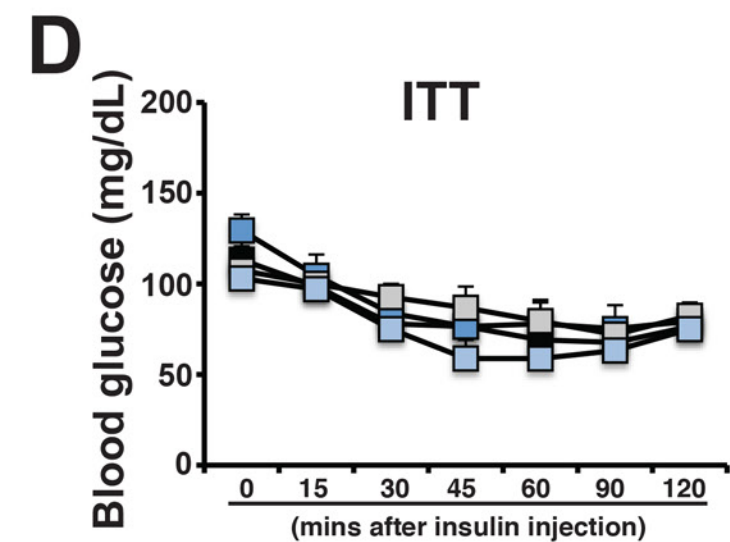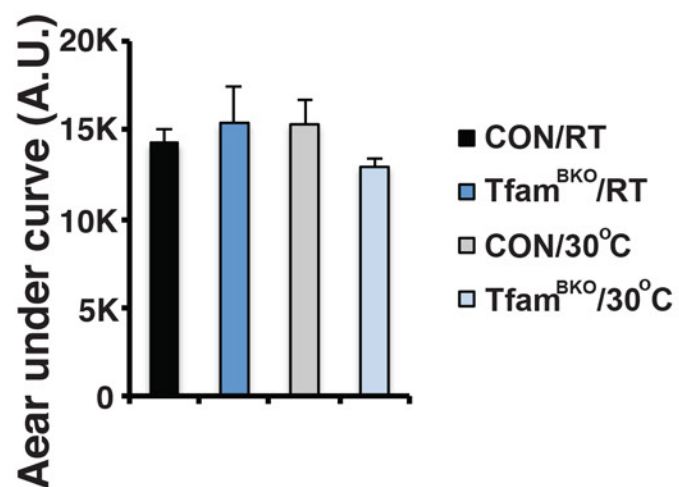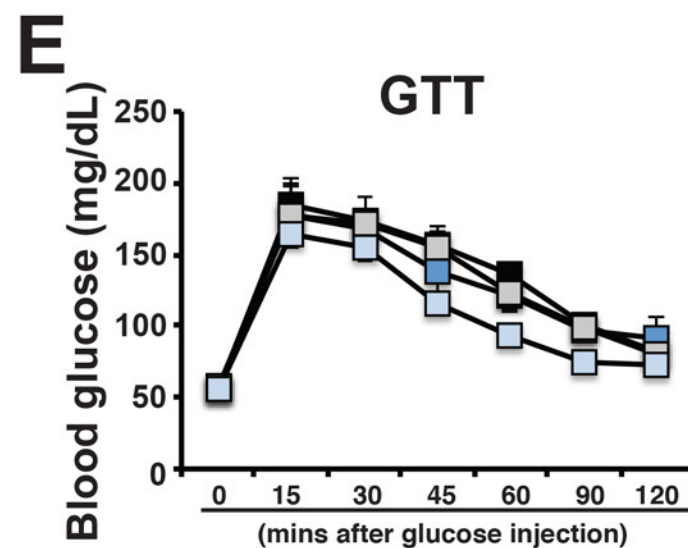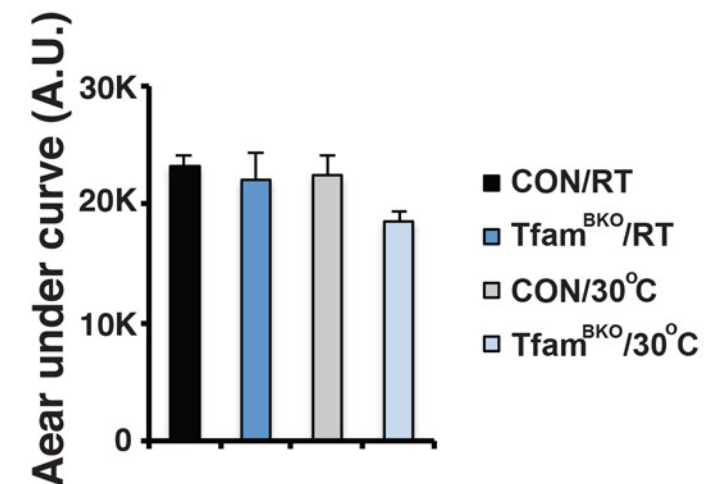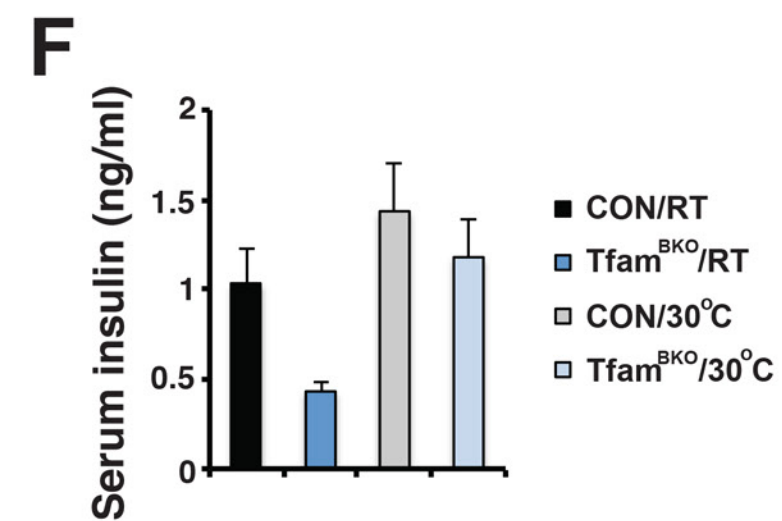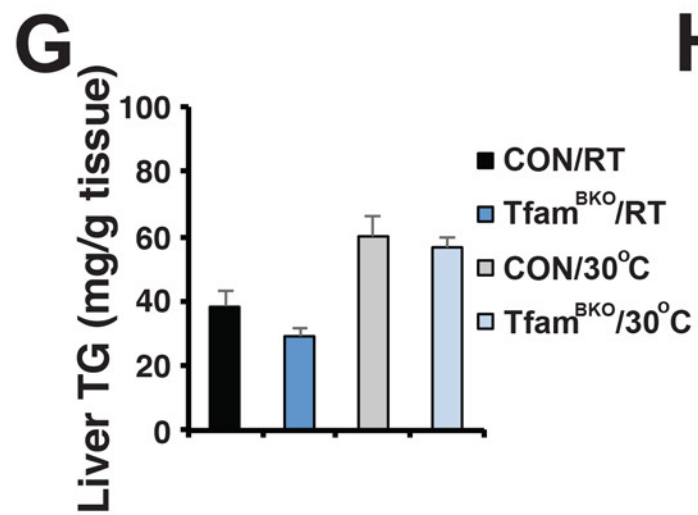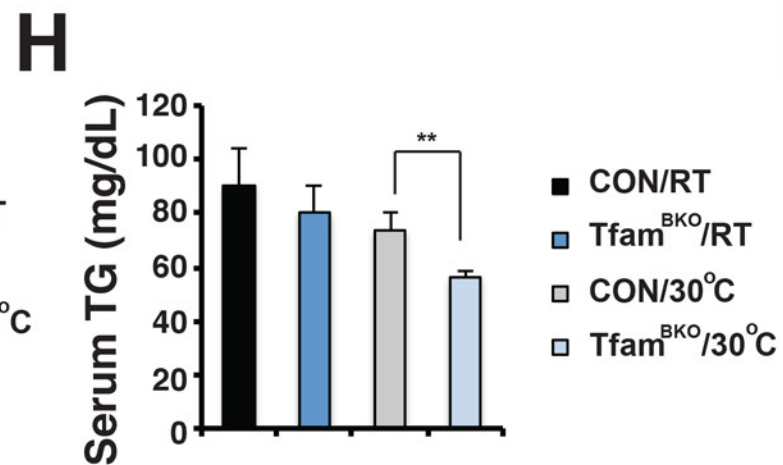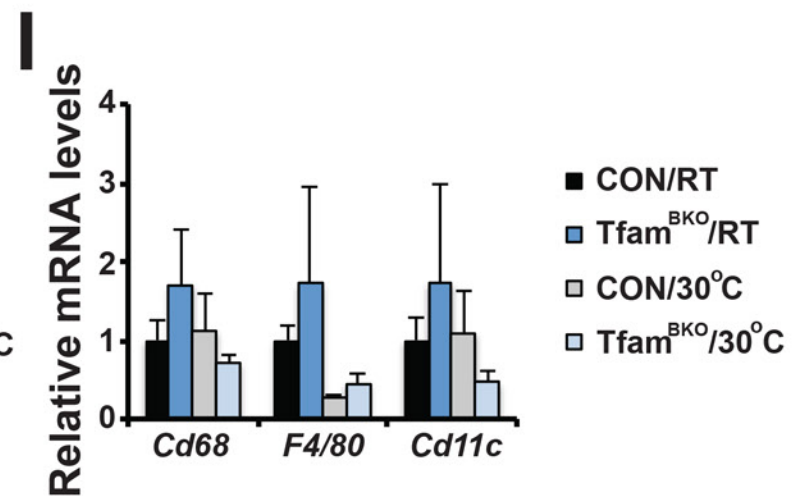

Supplementary Figure 6

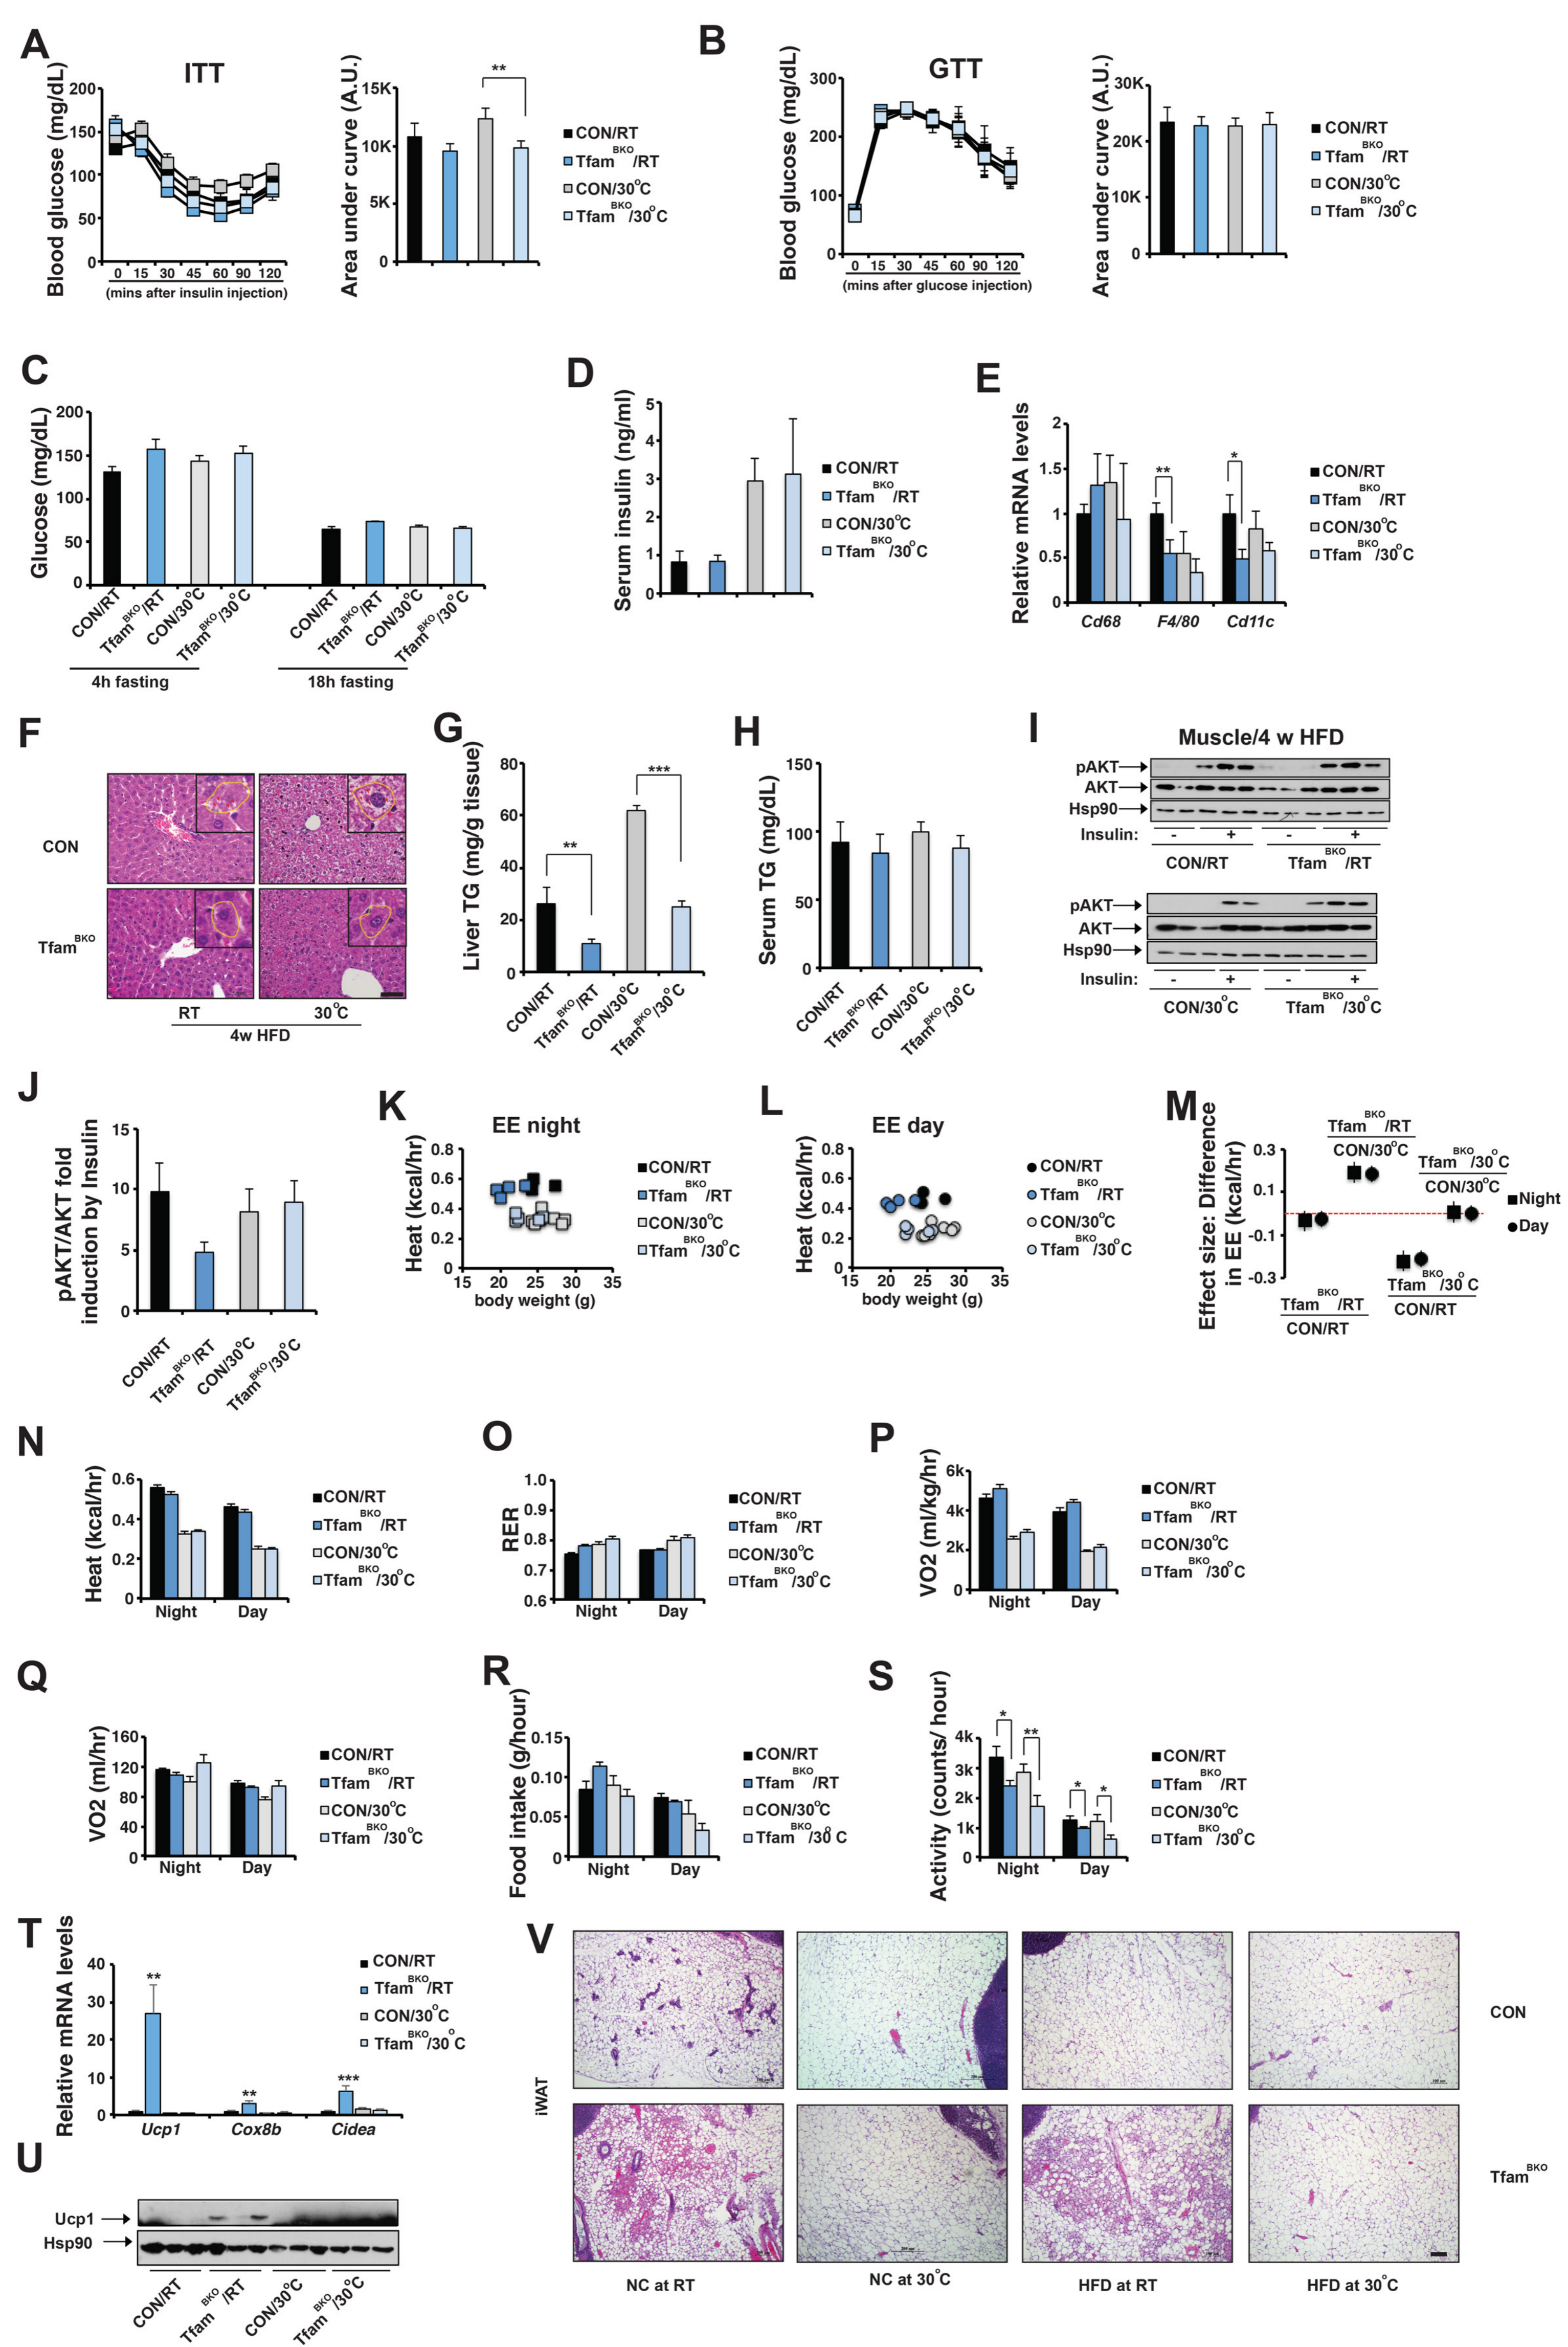

Supplementary Figure 7

## Supplementary table 1: List of primer sequences for q-PCR

---

|          |                           |
|----------|---------------------------|
| 36B4-F   | TTTGGGCATCACCACGAAAA      |
| 36B4-R   | GGACACCCTCCAGAAAGCGA      |
| Lkb1-F   | GCCTCCTGAGATTGCCAATG      |
| Lkb1-R   | GGTACAGGCCCGTGGTGAT       |
| Ucp1-F   | ACTGCCACACCTCCAGTCATT     |
| Ucp1-R   | CTTTGCCTCACTCAGGATTGG     |
| Cox8b-F  | GAACCATGAAGCCAACGACT      |
| Cox8b-R  | GCGAAGTTCACAGTGGTTCC      |
| Cidea-F  | TGCTCTTCTGTATCGCCCAGT     |
| Cidea-R  | GCCGTGTTAAGGAATCTGCTG     |
| Pgc1a-F  | AGCCGTGACCACTGACAACGAG    |
| Pgc1a-R  | GCTGCATGGTTCTGAGTGCTAAG   |
| Tfam-F   | AAGGATGATTCGGCTCAGG       |
| Tfam-R   | GGCTTTGAGACCTAACTGG       |
| mt-Nd4-F | CTAATAATCGCACATGGCCTC     |
| mt-Nd4-R | CGTAGTTGGAGTTTGCTAGG      |
| mt-Nd5-F | CATCCTTCTCAACTTTACTGGG    |
| mt-Nd5-R | TTTATGGGTGTAATGCGGT       |
| mt-Cyb-F | CCATTCTACGCTCAATCCCCA     |
| mt-Cyb-R | AGGCTTCGTTGCTTTGAGGTA     |
| mt-Co1-F | ACACAACCTTTCTTTGATCCCG    |
| mt-Co1-R | AGAATCAGAACAGATGCTGG      |
| mt-Co2-F | ATAATCCCAACAAACGACCT      |
| mt-Co2-R | CTCGGTTATCAACTTCTAGCA     |
| mt-Co3-F | GGTATAATTCTATTCATCGTCTCGG |
| mt-Co3-R | AGAACGCTCAGAAGAATCCT      |
| Ndufs1-F | AGGATATGTTTCGCACAACCTGG   |
| Ndufs1-R | TCATGGTAACAGAATCGAGGGA    |
| Ndufs4-F | CTGCCGTTTCCGTCTGTAGAG     |
| Ndufs4-R | TGTTATTGCGAGCAGGAACAAA    |
| Ndufs8-F | AGTGGCGGCAACGTACAAG       |
| Ndufs8-R | TCGAAAGAGGTAACCTTAGGGTCA  |
| Sdha-F   | GGAACACTCCAAAAACAGACCT    |
| Sdha-R   | CCACCACTGGGTATTGAGTAGAA   |
| Sdha-F   | AATTTGCCATTTACCGATGGGA    |
| Sdha-R   | AGCATCCAACACCATAGGTCC     |
| Sdhc-F   | GCTGCGTTCTTGCTGAGACA      |
| Sdhc-R   | ATCTCCTCCTTAGCTGTGGTT     |
| Sdhd-F   | TGGTCAGACCCGCTTATGTG      |
| Sdhd-R   | GGTCCAGTGGAGAGATGCAG      |
| Cyc1-F   | CAGCTTCCATTGCGGACAC       |
| Cyc1-R   | GGCACTCACGGCAGAATGAA      |
| Cox4-F   | ATGTCACGATGCTGTCTGCC      |
| Cox4-R   | GTGCCCTGTTTCATCTCGGC      |

---

---

|           |                          |
|-----------|--------------------------|
| Cox4i1-F  | ATTGGCAAGAGAGCCATTTCTAC  |
| Cox4i1-R  | CACGCCGATCAGCGTAAGT      |
| Cox5a-F   | GGGTCACACGAGACAGATGA     |
| Cox5a-R   | CCAAGATGCGAACAGCACTA     |
| Cox5b-F   | GATGAGGAGCAGGCTACTGG     |
| Cox5b-R   | TGCAGCCCCTATTCTCTTG      |
| Cox6b1-F  | CCCCAACCCAGAACCAGACTA    |
| Cox6b1-R  | GATCTTCCCAGGAAATGTGC     |
| Cox6c-F   | GTCTGCGGGTTCATATTGCT     |
| Cox6c-R   | CAGCCTTCCTCATCTCTTCG     |
| Cox7a2-F  | GAGGACCATCAGCACCCTT      |
| Cox7a2-R  | TTCTGCTTCTTGGGAAATGC     |
| Cox7a2l-F | TATTTGCCACACCAACCAA      |
| Cox7a2l-R | GCGATCAGGCAGTAGATGGT     |
| Cox7c-F   | ATGTTGGGCCAGAGTATCCG     |
| Cox7c-R   | ACCCAGATCCAAAGTACACGG    |
| Cox8h-F   | AGGAGTGCGACCCCGAGAATC    |
| Cox8h-R   | GGCTAAGACCCATCCTGCTGG    |
| Atp5a1-F  | TCTCCATGCCTCTAACACTCG    |
| Atp5a1-R  | CCAGGTCAACAGACGTGTCAG    |
| Atp5j2-F  | TGCCGAGCTGGATAATGATGC    |
| Atp5j2-R  | ACCATGCTAATCCCCGAGATG    |
| Atp5b-F   | GCAAGGCAGGGACAGCAGA      |
| Atp5b-R   | CCCAAGGTCTCAGGACCAACA    |
| mt-Atp8-F | GGCACCTTCACCAAATCACT     |
| mt-Atp8-R | GGGGTAATGAATGAGGCAAATAGA |
| mt-Atp6-F | CCTTCAATCCTATTCCCATCC    |
| mt-Atp6-R | GTTGGAAAGAATGGAGACGG     |
| Twinkle-F | TCTTAACTCAGAGCTTTGTCCCGT |
| Twinkle-R | GTACACAAGTCCAGGGCATAAC   |
| Ssbp1-F   | AGCCAGCAGTTTGGTTCTTG     |
| Ssbp1-R   | TATTCTGTGCCACGTCGTCT     |
| Gfm1-F    | TGGGATCTCAGCTCACATTG     |
| Gfm1-R    | TAGCTGCTGACTGGATCGTG     |
| Gfm2-F    | TTCCGTCATTAACCCTCCTG     |
| Gfm2-R    | GAGCCATGAAATCCGTCCT      |
| Tfb2m-F   | GAGGAACATGGATGGAGAGC     |
| Tfb2m-R   | AGGAACACCTGCTGACCAAG     |
| Mterf2-F  | CGACCAGCTCTGAAAATCAA     |
| Mterf2-R  | AGAAGCACCCATCCTTTTCAG    |
| Mtpap-F   | TTATCCCAGCATGGACCAGT     |
| Mtpap-R   | AAATGGAATTGCAGCCTCTG     |
| Polrmt-F  | AACATGTCCTGAGGGAGTGG     |
| Polrmt-R  | GCTGGTCAACTTCCTTTTGG     |
| PolG-F    | GCAGGATGGGCAGGAACA       |
| PolG-R    | GCATCCGGGAGTCCTGAA       |

---

---

|               |                         |
|---------------|-------------------------|
| Grsf1-F       | CCAAGCTAGGAGACGAGGTG    |
| Grsf1-R       | CATCCGGTGCTTTTCTAAGG    |
| Lrp4-F        | AGCCTGCTCCTGTGAGAAAG    |
| Lrp4-R        | TCCCAGATCTTGTGAGCAA     |
| Slip-F        | AGTACTGGTCGGCCTATTGC    |
| Slip-R        | GAGGAAAACCTGAACCCAACC   |
| Cd68-F        | GCAGCACAGTGGACATTCAT    |
| Cd68-R        | TTGCATTTCCACAGCAGAAG    |
| F4/80-F       | TTTCCTCGCCTGCTTCTTC     |
| F4/80-R       | CCCCGTCTCTGTATTCAACC    |
| Cd11c-F       | CAGAACTTCCCAACTGCACA    |
| Cd11c-R       | TCTCTGAAGCTGGCTCATCA    |
| Adiponectin-F | GATGGCACTCCTGGAGAGAA    |
| Adiponectin-R | TCTCCAGGCTCTCCTTTCT     |
| Leptin-F      | GAGACCCCTGTGTCTGGTTC    |
| Leptin-R      | CTGCGTGTGTGAAATGTCATTG  |
| Fgf21-F       | GTGTCAAAGCCTCTAGGTTTCTT |
| Fgf21-R       | GGTACACATTGTAACCGTCCTC  |
| Tnfa-F        | CCCACGTCGTAGCAAACCA     |
| Tnfa-R        | ACAAGGTACAACCCATCGGC    |
| Il1b-F        | TGCCACCTTTTGACAGTGATG   |
| Il1b-R        | AAGGTCCACGGGAAAGACAC    |
| Il6-F         | CCAGAGATACAAAGAAATGATGG |
| Il6-R         | ACTCCAGAAGACCAGAGGAAAT  |
| Visfatin-F    | CCCGATTGAAGTAAAGGCTGT   |
| Visfatin-R    | TGGTAAGCCAGTAGCACTCTG   |
| Resistin-F    | CTGTCCAGTCTATCCTTGCACAC |
| Resistin-R    | CAGAAGGCACAGCAGTCTTGA   |
| Rbp4-F        | TCTGTGGACGAGAAGGGTCAT   |
| Rbp4-R        | CCAGTTGCTCAGAAGACGGAC   |
| Ccl2-F        | CTTCTGGGCCTGCTGTTCA     |
| Ccl2-R        | CCAGCCTACTCATTGGGATCA   |

---
